# Supplementary material
Source: publisher site journal article supplement (https://www.dovepress.com/article/549490)
Supplement: Supplementary file 1 [file 549490%20Supplementary%20materials.docx]

# Supplementary File

Table S1. Codes used for the analyses

| Hemostatic Agents | Manufacturer |
| --- | --- |
| ARISTA | BECTON, DICKINSON AND COMPANY (BD) |
| ARTISS | BAXTER |
| AVITENE | DAVOL, INC. |
| EVITHROM | ETHICON, INC. |
| FLOSEAL | BAXTER |
| GELFOAM | PFIZER, INC. |
| GELFOAM PLUS | PFIZER, INC. |
| HELISTAT | INTEGRA LIFESCIENCES CORPORATION |
| HEMOSTASE | HEMOSTASIS, LLC |
| INSTAT | ETHICON, INC. |
| RECOTHROM | BAXTER |
| SURGICEL FIBRILLAR | ETHICON, INC. |
| VITAGEL | ORTHOVITA/STRYKER |
| TISSEEL | BAXTER |
| VITASURE | MEDAFOR, INC. |
| SURGICEL NUKNIT | ETHICON, INC. |
| SURGICEL ORIGINAL | ETHICON, INC. |
| SURGIFLO | ETHICON, INC. |
| SURGIFOAM | ETHICON, INC. |
| TACHOSIL | [CORZA MEDICAL](https://www.surgicalspecialties.com/surgical-specialties-is-now-corza-medical/) |
| VISTASEAL | ETHICON, INC. |
| EVICEL | ETHICON, INC. |
| GELFLOW | PFIZER, INC. |

| Code Type | Code | | | ICD Description | | | |
| --- | --- | --- | --- | --- | --- | --- | --- |
| **Total Knee Arth**r**oplasty (TKA)** | | | | | | | |
| ICD-10-PCS | 0SRC069 | | | REPL R KN JT W ZIRC POLYETH SYN CEM OA | | | |
| ICD-10-PCS | 0SRC06A | | | REPL R KN JT ZIRC POLYETH SYN UNCEM OA | | | |
| ICD-10-PCS | 0SRC06Z | | | REPL R KN JT W ZIRC POLYETH SYN SUB OA | | | |
| ICD-10-PCS | 0SRC07Z | | | REPL R KN JT W AUTOL TISS SUB OA | | | |
| ICD-10-PCS | 0SRC0EZ | | | REPL R KN JT W ARTC SPCR OA | | | |
| ICD-10-PCS | 0SRC0J9 | | | REPL R KN JT SYN CEM OA | | | |
| ICD-10-PCS | 0SRC0JA | | | REPL R KN JT SYN UNCEM OA | | | |
| ICD-10-PCS | 0SRC0JZ | | | REPL R KN JT SYN OA | | | |
| ICD-10-PCS | 0SRC0KZ | | | REPL R KN JT NONAUT OA | | | |
| ICD-10-PCS | 0SRC0N9 | | | REPL R KN JT W PATLOFEMR SYN CEM OA | | | |
| ICD-10-PCS | 0SRC0NA | | | REPL R KN JT PATLOFEMR SYN UNCEM OA | | | |
| ICD-10-PCS | 0SRC0NZ | | | REPL R KN JT W PATLOFEMR SYN SUB OA | | | |
| ICD-10-PCS | 0SRD069 | | | REPL L KN JT W ZIRC POLYETH SYN CEM OA | | | |
| ICD-10-PCS | 0SRD06A | | | REPL L KN JT ZIRC POLYETH SYN UNCEM OA | | | |
| ICD-10-PCS | 0SRD06Z | | | REPL L KN JT W ZIRC POLYETH SYN SUB OA | | | |
| ICD-10-PCS | 0SRD07Z | | | REPL L KN JT W AUTOL TISS SUB OA | | | |
| ICD-10-PCS | 0SRD0EZ | | | REPL L KN JT W ARTC SPCR OA | | | |
| ICD-10-PCS | 0SRD0J9 | | | REPL L KN JT SYN CEM OA | | | |
| ICD-10-PCS | 0SRD0JA | | | REPL L KN JT SYN UNCEM OA | | | |
| ICD-10-PCS | 0SRD0JZ | | | REPL L KN JT SYN OA | | | |
| ICD-10-PCS | 0SRD0KZ | | | REPL L KN JT NONAUT OA | | | |
| ICD-10-PCS | 0SRD0N9 | | | REPL L KN JT W PATLOFEMR SYN CEM OA | | | |
| ICD-10-PCS | 0SRD0NA | | | REPL L KN JT PATLOFEMR SYN SUB UNCEM OA | | | |
| ICD-10-PCS | 0SRD0NZ | | | REPL L KN JT W PATLOFEMR SYN SUB OA | | | |
| ICD-10-PCS | 0SRT07Z | | | REPL R KN JT FEMOR SURFC AUTOL TISS OA | | | |
| ICD-10-PCS | 0SRT0J9 | | | REPL R KN JT FEMORAL SURFC SYN CEM OA | | | |
| ICD-10-PCS | 0SRT0JA | | | REPL R KN JT FEMR SURFC SYN UNCEM OA | | | |
| ICD-10-PCS | 0SRT0JZ | | | REPL R KN JT FEMORAL SURFC SYN OA | | | |
| ICD-10-PCS | 0SRT0KZ | | | REPL R KN JT FEMORAL SURFC NONAUT OA | | | |
| ICD-10-PCS | 0SRU07Z | | | REPL L KN JT FEMOR SURFC AUTOL TISS OA | | | |
| ICD-10-PCS | 0SRU0J9 | | | REPL L KN JT FEMORAL SURFC SYN CEM OA | | | |
| ICD-10-PCS | 0SRU0JA | | | REPL L KN JT FEMR SURFC SYN UNCEM OA | | | |
| ICD-10-PCS | 0SRU0JZ | | | REPL L KN JT FEMORAL SURFC SYN OA | | | |
| ICD-10-PCS | 0SRU0KZ | | | REPL L KN JT FEMORAL SURFC NONAUT OA | | | |
| ICD-10-PCS | 0SRV07Z | | | REPL R KN JT TIBIAL SURFC AUTOL TISS OA | | | |
| ICD-10-PCS | 0SRV0J9 | | | REPL R KN JT TIBIAL SURFC SYN CEM OA | | | |
| ICD-10-PCS | 0SRV0JA | | | REPL R KN JT TIBIAL SURFC SYN UNCEM OA | | | |
| ICD-10-PCS | 0SRV0JZ | | | REPL R KN JT TIBIAL SURFC SYN OA | | | |
| ICD-10-PCS | 0SRV0KZ | | | REPL R KN JT TIBIAL SURFC NONAUT OA | | | |
| ICD-10-PCS | 0SRW07Z | | | REPL L KN JT TIBIAL SURFC AUTOL TISS OA | | | |
| ICD-10-PCS | 0SRW0J9 | | | REPL L KN JT TIBIAL SURFC SYN CEM OA | | | |
| ICD-10-PCS | 0SRW0JA | | | REPL L KN JT TIBIAL SURFC SYN UNCEM OA | | | |
| ICD-10-PCS | 0SRW0JZ | | | REPL L KN JT TIBIAL SURFC SYN OA | | | |
| ICD-10-PCS | 0SRW0KZ | | | REPL L KN JT TIBIAL SURFC NONAUT OA | | | |
| CPT | 27447 | | | Total knee replacement | | | |
| **Total Hip Arth**r**oplasty (THA)** | | | | | | | |
| **Code Type** | **Code** | | | **ICD Description** | | | |
| ICD-10-PCS | 0SR9019 | | | REPL R HP JT W METL SYN SUB CEM OA | | | |
| ICD-10-PCS | 0SR901A | | | REPL R HP JT W METL SYN SUB UNCEM OA | | | |
| ICD-10-PCS | 0SR901Z | | | REPL R HP JT W METL SYN SUB OA | | | |
| ICD-10-PCS | 0SR9029 | | | REPL R HP JT METL POLYETH SYN CEM OA | | | |
| ICD-10-PCS | 0SR902A | | | REPL R HP JT METL POLYETH SYN UNCEM OA | | | |
| ICD-10-PCS | 0SR902Z | | | REPL R HP JT METL POLYETH SYN SUB OA | | | |
| ICD-10-PCS | 0SR9039 | | | REPL R HP JT W CERM SYN SUB CEM OA | | | |
| ICD-10-PCS | 0SR903A | | | REPL R HP JT CERM SYN SUB UNCEM OA | | | |
| ICD-10-PCS | 0SR903Z | | | REPL R HP JT W CERM SYN SUB OA | | | |
| ICD-10-PCS | 0SR9049 | | | REPL R HP JT CERM POLYETH SYN CEM OA | | | |
| ICD-10-PCS | 0SR904A | | | REPL R HP JT CERM POLYETH SYN UNCEM OA | | | |
| ICD-10-PCS | 0SR904Z | | | REPL R HP JT CERM ON POLYETH SYN OA | | | |
| ICD-10-PCS | 0SR9069 | | | REPL R HP JT W ZIRC POLYETH SYN CEM OA | | | |
| ICD-10-PCS | 0SR906A | | | REPL R HP JT ZIRC POLYETH SYN UNCEM OA | | | |
| ICD-10-PCS | 0SR906Z | | | REPL R HP JT W ZIRC POLYETH SYN SUB OA | | | |
| ICD-10-PCS | 0SR907Z | | | REPL R HP JT W AUTOL TISS SUB OA | | | |
| ICD-10-PCS | 0SR90EZ | | | REPL R HP JT W ARTC SPCR OA | | | |
| ICD-10-PCS | 0SR90J9 | | | REPL R HP JT SYN CEM OA | | | |
| ICD-10-PCS | 0SR90JA | | | REPL R HP JT SYN UNCEM OA | | | |
| ICD-10-PCS | 0SR90JZ | | | REPL R HP JT SYN OA | | | |
| ICD-10-PCS | 0SR90KZ | | | REPL R HP JT NONAUT OA | | | |
| ICD-10-PCS | 0SRB019 | | | REPL L HP JT W METL SYN SUB CEM OA | | | |
| ICD-10-PCS | 0SRB01A | | | REPL L HP JT W METL SYN SUB UNCEM OA | | | |
| ICD-10-PCS | 0SRB01Z | | | REPL L HP JT W METL SYN SUB OA | | | |
| ICD-10-PCS | 0SRB029 | | | REPL L HP JT METL POLYETH SYN CEM OA | | | |
| ICD-10-PCS | 0SRB02A | | | REPL L HP JT METL POLYETH SYN UNCEM OA | | | |
| ICD-10-PCS | 0SRB02Z | | | REPL L HP JT METL POLYETH SYN SUB OA | | | |
| ICD-10-PCS | 0SRB039 | | | REPL L HP JT W CERM SYN SUB CEM OA | | | |
| ICD-10-PCS | 0SRB03A | | | REPL L HP JT CERM SYN SUB UNCEM OA | | | |
| ICD-10-PCS | 0SRB03Z | | | REPL L HP JT W CERM SYN SUB OA | | | |
| ICD-10-PCS | 0SRB049 | | | REPL L HP JT CERM POLYETH SYN CEM OA | | | |
| ICD-10-PCS | 0SRB04A | | | REPL L HP JT CERM POLYETH SYN UNCEM OA | | | |
| ICD-10-PCS | 0SRB04Z | | | REPL L HP JT CERM POLYETH SYN SUB OA | | | |
| ICD-10-PCS | 0SRB069 | | | REPL L HP JT W ZIRC POLYETH SYN CEM OA | | | |
| ICD-10-PCS | 0SRB06A | | | REPL L HP JT ZIRC POLYETH SYN UNCEM OA | | | |
| ICD-10-PCS | 0SRB06Z | | | REPL L HP JT W ZIRC POLYETH SYN SUB OA | | | |
| ICD-10-PCS | 0SRB07Z | | | REPL L HP JT W AUTOL TISS SUB OA | | | |
| ICD-10-PCS | 0SRB0EZ | | | REPL L HP JT W ARTC SPCR OA | | | |
| ICD-10-PCS | 0SRB0J9 | | | REPL L HP JT SYN CEM OA | | | |
| ICD-10-PCS | 0SRB0JA | | | REPL L HP JT SYN UNCEM OA | | | |
| ICD-10-PCS | 0SRB0JZ | | | REPL L HP JT SYN OA | | | |
| ICD-10-PCS | 0SRB0KZ | | | REPL L HP JT NONAUT OA | | | |
| CPT | 27130 | | | Total Hip Replacement | | | |
| **Spine fusion** | | | | | | | |
| **Code type** | **Code** | | **Code description** | | | | **Anatomy** |
| ICD-10-PCS | 0RG0% | | Fusion of Occipital-cervical Joint | | | | Cervical |
| ICD-10-PCS | 0RG1% | | Fusion of Cervical Vertebral Joint | | | | Cervical |
| ICD-10-PCS | 0RG2% | | Fusion of Cervical Vertebral Joints, 2 or more | | | | Cervical |
| ICD-10-PCS | 0RG4% | | Fusion of Cervicothoracic Vertebral Joint | | | | Cervicothoracic |
| ICD-10-PCS | 0SG0% | | Fusion of Lumbar Vertebral Joint | | | | Lumbar |
| ICD-10-PCS | 0SG1% | | Fusion of Lumbar Vertebral Joints, 2 or more | | | | Lumbar |
| ICD-10-PCS | XRGB% | | Lumbar Vertebral Joint | | | | Lumbar |
| ICD-10-PCS | XRGC% | | Lumbar Vertebral Joints, 2 or more | | | | Lumbar |
| ICD-10-PCS | 0SG3% | | Fusion of Lumbosacral Joint | | | | Lumbosacral |
| ICD-10-PCS | XRGD% | | Lumbosacral Joint | | | | Lumbosacral |
| ICD-10-PCS | 0RG6% | | Fusion of Thoracic Vertebral Joint | | | | Thoracic |
| ICD-10-PCS | 0RG7% | | Fusion of Thoracic Vertebral Joints, 2 to 7 | | | | Thoracic |
| ICD-10-PCS | 0RG8% | | Fusion of Thoracic Vertebral Joints, 8 or more | | | | Thoracic |
| ICD-10-PCS | 0RGA% | | Fusion of Thoracolumbar Vertebral Joint | | | | Thoracolumbar |
| ICD-10-PCS | XRGA% | | Thoracolumbar Vertebral Joint | | | | Thoracolumbar |
| CPT | 22551 | | ARTHRD ANT NTRBDY CERVICAL | | | | Cervical |
| CPT | 22554 | | NECK SPINE FUSION | | | | Cervical |
| CPT | 22590 | | SPINE & SKULL SPINAL FUSION | | | | Cervical |
| CPT | 22595 | | NECK SPINAL FUSION | | | | Cervical |
| CPT | 22600 | | NECK SPINE FUSION | | | | Cervical |
| CPT | 22533 | | ARTHRDSIS LAT MINI DISKECT; LUMB | | | | Lumbar |
| CPT | 22558 | | LUMBAR SPINE FUSION | | | | Lumbar |
| CPT | 22612 | | LUMBAR SPINE FUSION | | | | Lumbar |
| CPT | 22630 | | LUMBAR SPINE FUSION | | | | Lumbar |
| CPT | 22633 | | ARTHRD CMBN 1NTRSPC LUMBAR | | | | Lumbar |
| CPT | 22586 | | ARTHRD PRE-SAC NTRBDY L5-S1 | | | | Lumbosacral |
| CPT | 22556 | | THORAX SPINE FUSION | | | | Thoracic |
| CPT | 22610 | | THORAX SPINE FUSION | | | | Thoracic |
| **Spine laminectomy** | | | | | | | |
| **Code Type** | **Code** | | **Definition** | | | | **Anatomy** |
| ICD-10-PCS | 0RB0% | | Excision of Cervical/Cervicothoracic vertebral joint | | | | cervical |
| ICD-10-PCS | 0RB1% | | Excision of Cervical Vertebral Joint | | | | cervical |
| ICD-10-PCS | 0RB4% | | Excision of Cervicothoracic Vertebral Joint | | | | cervical |
| ICD-10-PCS | 0RBA% | | Excision / Thoracolumbar Vertebral Joint | | | | lumbar |
| ICD-10-PCS | 0RB6% | | Excision / Thoracic Vertebral Joint | | | | thoracic |
| ICD-10-PCS | 0SB0% | | Excision of Lumbar vertebral Joint | | | | lumbar |
| ICD-10-PCS | 0SB3% | | Excision of Lumbosacral vertebral Joint | | | | lumbar |
| CPT | 63001 | | Laminectomy with exploration and/or decompression of spinal cord and/or cauda equina, without facetectomy, foraminotomy or discectomy (eg, spinal stenosis), 1 or 2 vertebral segments; cervical | | | | cervical |
| CPT | 63015 | | Laminectomy with exploration and/or decompression of spinal cord and/or cauda equina, without facetectomy, foraminotomy or discectomy (eg, spinal stenosis), more than 2 vertebral segments; cervical | | | | cervical |
| CPT | 63045 | | Laminectomy, facetectomy and foraminotomy (unilateral or bilateral with decompression of spinal cord, cauda equina and/or nerve root[s], [eg, spinal or lateral recess stenosis]), single vertebral segment; cervical | | | | cervical |
| CPT | 63050 | | Laminoplasty, cervical, with decompression of the spinal cord, 2 or more vertebral segments; | | | | cervical |
| CPT | 63051 | | Laminoplasty, cervical, with decompression of the spinal cord, 2 or more vertebral segments; with reconstruction of the posterior bony elements (including the application of bridging bone graft and non-segmental fixation devices [eg, wire, suture, mini-plates], when performed) | | | | cervical |
| CPT | 63005 | | Laminectomy with exploration and/or decompression of spinal cord and/or cauda equina, without facetectomy, foraminotomy or discectomy (eg, spinal stenosis), 1 or 2 vertebral segments; lumbar, except for spondylolisthesis | | | | lumbar |
| CPT | 63017 | | Laminectomy with exploration and/or decompression of spinal cord and/or cauda equina, without facetectomy, foraminotomy or discectomy (eg, spinal stenosis), more than 2 vertebral segments; lumbar | | | | lumbar |
| CPT | 63020 | | Laminotomy (hemilaminectomy), with decompression of nerve root(s), including partial facetectomy, foraminotomy and/or excision of herniated intervertebral disc; 1 interspace, cervical | | | | cervical |
| CPT | 63030 | | Laminotomy (hemilaminectomy), with decompression of nerve root(s), including partial facetectomy, foraminotomy and/or excision of herniated intervertebral disc; 1 interspace, lumbar | | | | lumbar |
| CPT | 63040 | | Laminotomy (hemilaminectomy), with decompression of nerve root(s), including partial facetectomy, foraminotomy and/or excision of herniated intervertebral disc, reexploration, single interspace; cervical | | | | cervical |
| CPT | 63042 | | Laminotomy (hemilaminectomy), with decompression of nerve root(s), including partial facetectomy, foraminotomy and/or excision of herniated intervertebral disc, reexploration, single interspace; lumbar | | | | lumbar |
| CPT | 63047 | | Laminectomy, facetectomy and foraminotomy (unilateral or bilateral with decompression of spinal cord, cauda equina and/or nerve root[s], [eg, spinal or lateral recess stenosis]), single vertebral segment; lumbar | | | | lumbar |
| CPT | 63003 | | Laminectomy with exploration and/or decompression of spinal cord and/or cauda equina, without facetectomy, foraminotomy or discectomy (eg, spinal stenosis), 1 or 2 vertebral segments; thoracic | | | | thoracic |
| CPT | 63016 | | Laminectomy with exploration and/or decompression of spinal cord and/or cauda equina, without facetectomy, foraminotomy or discectomy (eg, spinal stenosis), more than 2 vertebral segments; thoracic | | | | thoracic |
| CPT | 63046 | | Laminectomy, facetectomy and foraminotomy (unilateral or bilateral with decompression of spinal cord, cauda equina and/or nerve root[s], [eg, spinal or lateral recess stenosis]), single vertebral segment; thoracic | | | | thoracic |
| **Spine discectomy** | | | | | | | |
| **Code Type** | **Code** | | **Definition** | | | | **Anatomy** |
| ICD-10-PCS | 0RB3% | | Excision of Cervical Vertebral Disc | | | | cervical |
| ICD-10-PCS | 0RB5% | | Excision of Cervicothoracic disc | | | | cervical |
| ICD-10-PCS | 0RBB% | | Excision of Thoracolumbar Vertebral Disc | | | | lumbar |
| ICD-10-PCS | 0RB9% | | Excision / Thoracic Vertebral Disc | | | | thoracic |
| ICD-10-PCS | 0RT*% | | Resection Cervical/Cervicothoracic vertebral disc or joint | | | | cervical |
| ICD-10-PCS | 0RT3% | | Resection of Cervical Vertebral Disc | | | | cervical |
| ICD-10-PCS | 0RT4% | | Resection of Cervicothoracic Vertebral Joint | | | | cervical |
| ICD-10-PCS | 0RT9% | | Resection / Thoracic Vertebral Disc | | | | thoracic |
| ICD-10-PCS | 0RTB% | | Resection / Thoracolumbar Vertebral Disc | | | | lumbar |
| ICD-10-PCS | 0SB2% | | Excision of Lumbar Vertebral Disc | | | | lumbar |
| ICD-10-PCS | 0SB4% | | Excision of Lumbosacral Disc | | | | lumbar |
| ICD-10-PCS | 0ST2% | | Resection / Lumbar Vertebral Disc | | | | lumbar |
| ICD-10-PCS | 0ST4% | | Resection / Lumbosacral Vertebral Disc | | | | lumbar |
| CPT | 63075 | | Discectomy, anterior, with decompression of spinal cord and/or nerve root(s), including osteophytectomy; cervical, single interspace | | | | cervical |
| CPT | 63077 | | Discectomy, anterior, with decompression of spinal cord and/or nerve root(s), including osteophytectomy; thoracic, single interspace | | | | thoracic |
| **Bariatric su**r**gery** | | | | | | | |
| **Code Type** | **Code** | **Definition** | | | | | |
| CPT | S2082 | Laparoscopy, surgical; gastric restrictive procedure, adjustable gastric band (includes placement of subcutaneous port) | | | | | |
| CPT | S2085 | Laparoscopy, gastric restrictive procedure, with gastric bypass for morbid obesity, with short limb (less than 100 cm) roux-en-y gastroenterostomy | | | | | |
| CPT | 43644 | Laparoscopy, surgical, gastric restrictive procedure; with gastric bypass and Roux-en-Y gastroenterostomy (roux limb 150 cm or less) | | | | | |
| CPT | 43645 | Laparoscopy, surgical, gastric restrictive procedure; with gastric bypass and small intestine reconstruction to limit absorption | | | | | |
| CPT | 43659 | Unlisted laparoscopy procedure, stomach | | | | | |
| CPT | 43770 | Laparoscopy, surgical, gastric restrictive procedure; placement of adjustable gastric restrictive device (eg, gastric band and subcutaneousport components) | | | | | |
| CPT | 43775 | Laparoscopy, surgical, gastric restrictive procedure; longitudinal gastrectomy (ie, sleeve gastrectomy) | | | | | |
| CPT | 43842 | Gastric restrictive procedure, without gastric bypass, for morbid obesity; vertical-banded gastroplasty | | | | | |
| CPT | 43843 | Gastric restrictive procedure, without gastric bypass, for morbid obesity; other than vertical-banded gastroplasty | | | | | |
| CPT | 43845 | Gastric restrictive procedure with partial gastrectomy, pylorus-preserving duodenoileostomy and ileoileostomy (50 to 100 cm common channel) to limit absorption (biliopancreatic diversion with duodenal switch) | | | | | |
| CPT | 43846 | Gastric restrictive procedure, with gastric bypass for morbid obesity; with short limb (150 cm or less) Roux-en-Y gastroenterostomy | | | | | |
| CPT | 43847 | Gastric restrictive procedure, with gastric bypass for morbid obesity; with small intestine reconstruction to limit absorption | | | | | |
| CPT | 43844 | gastric bypass for obesity | | | | | |
| CPT | 0D1607A | Bypass Stomach to Jejunum with Autologous Tissue Substitute, Open Appr | | | | | |
| CPT | 0D160ZA | Bypass Stomach to Jejunum, Open Approach | | | | | |
| ICD-10 PCS | 0D1647A | Bypass Stomach to Jejunum w Autolog Tissue Substitute, Perq Endo Appr | | | | | |
| ICD-10 PCS | 0D164ZA | Bypass Stomach to Jejunum, Percutaneous Endoscopic Approach | | | | | |
| ICD-10 PCS | 0DB64Z3 | Excision of Stomach, Percutaneous Endoscopic Approach, Vertical | | | | | |
| ICD-10 PCS | 0D164ZA | Bypass Stomach to Jejunum, Percutaneous Endoscopic Approach | | | | | |
| ICD-10 PCS | 0DB64Z3 | Excision of Stomach, Percutaneous Endoscopic Approach, Vertical | | | | | |
| **Colorectal surgery** | | | | | | | |
| **Code Type** | **Anatomy** | **Approach** | | | **Code** | **Definition** | |
| ICD-10 PCS | Ascending | MIS | | | 0D1H47K | BYP CEC TO ASC CLN W AUTOL TISS PE | |
| ICD-10 PCS | Ascending | MIS | | | 0D1H4JK | BYP CEC TO ASC CLN SYN PE | |
| ICD-10 PCS | Ascending | MIS | | | 0D1H4KK | BYP CEC TO ASC CLN NONAUT PE | |
| ICD-10 PCS | Ascending | MIS | | | 0D1H4ZK | BYP CEC TO ASC CLN PE | |
| ICD-10 PCS | Ascending | MIS | | | 0D1K3J4 | BYP ASC CLN TO CUTAN SYN PA | |
| ICD-10 PCS | Ascending | MIS | | | 0D1K474 | BYP ASC CLN TO CUTAN AUTOL TISS PE | |
| ICD-10 PCS | Ascending | MIS | | | 0D1K47K | BYP ASC CLN,ASC CLN W AUTOL TISS SUB PE | |
| ICD-10 PCS | Ascending | MIS | | | 0D1K4J4 | BYP ASC CLN TO CUTAN SYN PE | |
| ICD-10 PCS | Ascending | MIS | | | 0D1K4JK | BYP ASC CLN TO ASC CLN SYN PE | |
| ICD-10 PCS | Ascending | MIS | | | 0D1K4K4 | BYP ASC CLN TO CUTAN NONAUT PE | |
| ICD-10 PCS | Ascending | MIS | | | 0D1K4KK | BYP ASC CLN TO ASC CLN NONAUT PE | |
| ICD-10 PCS | Ascending | MIS | | | 0D1K4Z4 | BYP ASC CLN TO CUTAN PE | |
| ICD-10 PCS | Ascending | MIS | | | 0D1K4ZK | BYP ASC CLN TO ASC CLN PE | |
| ICD-10 PCS | Ascending | MIS | | | 0DBK3ZZ | EXCISION ASC CLN PA | |
| ICD-10 PCS | Ascending | MIS | | | 0DBK4ZZ | EXCISION ASC CLN PE | |
| ICD-10 PCS | Ascending | MIS | | | 0DTK4ZZ | RECT ASC CLN PE | |
| ICD-10 PCS | Ascending | NAO | | | 0D1H87K | BYP CEC,ASC CLN W AUTOL NAT/ART OP ENDO | |
| ICD-10 PCS | Ascending | NAO | | | 0D1H8JK | BYP CEC,ASC CLN SYN VIA NAT/ART OP ENDO | |
| ICD-10 PCS | Ascending | NAO | | | 0D1H8KK | BYP CEC,ASC CLN NONAUT NAT/ART OP ENDO | |
| ICD-10 PCS | Ascending | NAO | | | 0D1H8ZK | BYP CEC ASC CLN NAT/ART OP ENDO | |
| ICD-10 PCS | Ascending | NAO | | | 0D1K874 | BYP ASC CLN,CUTAN AUTOL NAT/ART OP ENDO | |
| ICD-10 PCS | Ascending | NAO | | | 0D1K87K | BYP ASC CLN,ASC CLN W AUTOL NAT/ART ENDO | |
| ICD-10 PCS | Ascending | NAO | | | 0D1K8J4 | BYP ASC CLN,CUTAN SYN NAT/ART OP ENDO | |
| ICD-10 PCS | Ascending | NAO | | | 0D1K8JK | BYP ASC CLN,ASC CLN SYN NAT/ART OP ENDO | |
| ICD-10 PCS | Ascending | NAO | | | 0D1K8K4 | BYP ASC CLN,CUTAN NONAUT NAT/ART OP ENDO | |
| ICD-10 PCS | Ascending | NAO | | | 0D1K8KK | BYP ASC CLN,ASC CLN NONAUT NAT/ART ENDO | |
| ICD-10 PCS | Ascending | NAO | | | 0D1K8Z4 | BYP ASC CLN TO CUTAN NAT/ART OP ENDO | |
| ICD-10 PCS | Ascending | NAO | | | 0D1K8ZK | BYP ASC CLN TO ASC CLN NAT/ART ENDO | |
| ICD-10 PCS | Ascending | NAO | | | 0DTK7ZZ | RECT ASC CLN VIA NAT/ART OP | |
| ICD-10 PCS | Ascending | NAO | | | 0DTK8ZZ | RECT ASC CLN VIA NAT/ART OP ENDO | |
| ICD-10 PCS | Ascending | Open | | | 0D1H07K | BYP CEC TO ASC CLN W AUTOL TISS SUB OA | |
| ICD-10 PCS | Ascending | Open | | | 0D1H0JK | BYP CEC TO ASC CLN SYN OA | |
| ICD-10 PCS | Ascending | Open | | | 0D1H0KK | BYP CEC TO ASC CLN NONAUT OA | |
| ICD-10 PCS | Ascending | Open | | | 0D1H0ZK | BYP CEC TO ASC CLN OA | |
| ICD-10 PCS | Ascending | Open | | | 0D1K074 | BYP ASC CLN TO CUTAN W AUTOL TISS SUB OA | |
| ICD-10 PCS | Ascending | Open | | | 0D1K07K | BYP ASC CLN ASC CLN AUTOL TISS SUB OA | |
| ICD-10 PCS | Ascending | Open | | | 0D1K0J4 | BYP ASC CLN TO CUTAN SYN OA | |
| ICD-10 PCS | Ascending | Open | | | 0D1K0JK | BYP ASC CLN TO ASC CLN SYN OA | |
| ICD-10 PCS | Ascending | Open | | | 0D1K0K4 | BYP ASC CLN TO CUTAN NONAUT OA | |
| ICD-10 PCS | Ascending | Open | | | 0D1K0KK | BYP ASC CLN TO ASC CLN NONAUT OA | |
| ICD-10 PCS | Ascending | Open | | | 0D1K0Z4 | BYP ASC CLN TO CUTAN OA | |
| ICD-10 PCS | Ascending | Open | | | 0D1K0ZK | BYP ASC CLN TO ASC CLN OA | |
| ICD-10 PCS | Ascending | Open | | | 0DBK0ZZ | EXCISION ASC CLN OA | |
| ICD-10 PCS | Ascending | Open | | | 0DTK0ZZ | RECT ASC CLN OA | |
| ICD-10 PCS | Cecum | MIS | | | 0D1H3J4 | BYP CEC TO CUTAN SYN PA | |
| ICD-10 PCS | Cecum | MIS | | | 0D1H474 | BYP CEC CUTAN AUTOL TISS SUB PE | |
| ICD-10 PCS | Cecum | MIS | | | 0D1H47H | BYP CEC TO CEC W AUTOL TISS SUB PE | |
| ICD-10 PCS | Cecum | MIS | | | 0D1H4J4 | BYP CEC TO CUTAN SYN PE | |
| ICD-10 PCS | Cecum | MIS | | | 0D1H4JH | BYP CEC TO CEC SYN PE | |
| ICD-10 PCS | Cecum | MIS | | | 0D1H4K4 | BYP CEC TO CUTAN NONAUT PE | |
| ICD-10 PCS | Cecum | MIS | | | 0D1H4KH | BYP CEC TO CEC NONAUT PE | |
| ICD-10 PCS | Cecum | MIS | | | 0D1H4Z4 | BYP CEC TO CUTAN PE | |
| ICD-10 PCS | Cecum | MIS | | | 0D1H4ZH | BYP CEC TO CEC PE | |
| ICD-10 PCS | Cecum | MIS | | | 0DBH3ZZ | EXCISION CEC PA | |
| ICD-10 PCS | Cecum | MIS | | | 0DBH4ZZ | EXCISION CEC PE | |
| ICD-10 PCS | Cecum | MIS | | | 0DTH4ZZ | RECT CEC PE | |
| ICD-10 PCS | Cecum | NAO | | | 0D1H874 | BYP CEC,CUTAN W AUTOL NAT/ART OP ENDO | |
| ICD-10 PCS | Cecum | NAO | | | 0D1H87H | BYP CEC,CEC W AUTOL NAT/ART OP ENDO | |
| ICD-10 PCS | Cecum | NAO | | | 0D1H8J4 | BYP CEC TO CUTAN SYN NAT/ART ENDO | |
| ICD-10 PCS | Cecum | NAO | | | 0D1H8JH | BYP CEC TO CEC SYN NAT/ART OP ENDO | |
| ICD-10 PCS | Cecum | NAO | | | 0D1H8K4 | BYP CEC,CUTAN NONAUT VIA NAT/ART OP ENDO | |
| ICD-10 PCS | Cecum | NAO | | | 0D1H8KH | BYP CEC CEC NONAUT NAT/ART OP ENDO | |
| ICD-10 PCS | Cecum | NAO | | | 0D1H8Z4 | BYP CEC TO CUTAN VIA NAT/ART OP ENDO | |
| ICD-10 PCS | Cecum | NAO | | | 0D1H8ZH | BYP CEC TO CEC VIA NAT/ART OP ENDO | |
| ICD-10 PCS | Cecum | NAO | | | 0DTH7ZZ | RECT CEC VIA NAT/ART OP | |
| ICD-10 PCS | Cecum | NAO | | | 0DTH8ZZ | RECT CEC VIA NAT/ART OP ENDO | |
| ICD-10 PCS | Cecum | Open | | | 0D1H074 | BYP CEC TO CUTAN W AUTOL TISS SUB OA | |
| ICD-10 PCS | Cecum | Open | | | 0D1H07H | BYP CEC TO CEC W AUTOL TISS SUB OA | |
| ICD-10 PCS | Cecum | Open | | | 0D1H0J4 | BYP CEC TO CUTAN SYN OA | |
| ICD-10 PCS | Cecum | Open | | | 0D1H0JH | BYP CEC TO CEC SYN OA | |
| ICD-10 PCS | Cecum | Open | | | 0D1H0K4 | BYP CEC TO CUTAN NONAUT OA | |
| ICD-10 PCS | Cecum | Open | | | 0D1H0KH | BYP CEC TO CEC NONAUT OA | |
| ICD-10 PCS | Cecum | Open | | | 0D1H0Z4 | BYP CEC TO CUTAN OA | |
| ICD-10 PCS | Cecum | Open | | | 0D1H0ZH | BYP CEC TO CEC OA | |
| ICD-10 PCS | Cecum | Open | | | 0DBH0ZZ | EXCISION CEC OA | |
| ICD-10 PCS | Cecum | Open | | | 0DTH0ZZ | RECT CEC OA | |
| ICD-10 PCS | Descending | MIS | | | 0D1H47M | BYP CEC TO DESC CLN AUTOL TISS PE | |
| ICD-10 PCS | Descending | MIS | | | 0D1H4JM | BYP CEC TO DESC CLN SYN PE | |
| ICD-10 PCS | Descending | MIS | | | 0D1H4KM | BYP CEC TO DESC CLN NONAUT PE | |
| ICD-10 PCS | Descending | MIS | | | 0D1H4ZM | BYP CEC TO DESC CLN PE | |
| ICD-10 PCS | Descending | MIS | | | 0D1K47M | BYP ASC CLN,DESC CLN AUTOL TISS SUB PE | |
| ICD-10 PCS | Descending | MIS | | | 0D1K4JM | BYP ASC CLN TO DESC CLN SYN PE | |
| ICD-10 PCS | Descending | MIS | | | 0D1K4KM | BYP ASC CLN TO DESC CLN NONAUT PE | |
| ICD-10 PCS | Descending | MIS | | | 0D1K4ZM | BYP ASC CLN TO DESC CLN PE | |
| ICD-10 PCS | Descending | MIS | | | 0D1L47M | BYP TRAN CLN,DESC CLN W AUTOL PE | |
| ICD-10 PCS | Descending | MIS | | | 0D1L4JM | BYP TRAN CLN TO DESC CLN SYN PE | |
| ICD-10 PCS | Descending | MIS | | | 0D1L4KM | BYP TRAN CLN TO DESC CLN NONAUT PE | |
| ICD-10 PCS | Descending | MIS | | | 0D1L4ZM | BYP TRAN CLN TO DESC CLN PE | |
| ICD-10 PCS | Descending | MIS | | | 0D1M3J4 | BYP DESC CLN TO CUTAN SYN PA | |
| ICD-10 PCS | Descending | MIS | | | 0D1M474 | BYP DESC CLN,CUTAN W AUTOL TISS SUB PE | |
| ICD-10 PCS | Descending | MIS | | | 0D1M47M | BYP DESC CLN,DESC CLN AUTOL TISS SUB PE | |
| ICD-10 PCS | Descending | MIS | | | 0D1M4J4 | BYP DESC CLN TO CUTAN SYN PE | |
| ICD-10 PCS | Descending | MIS | | | 0D1M4JM | BYP DESC CLN TO DESC CLN SYN PE | |
| ICD-10 PCS | Descending | MIS | | | 0D1M4K4 | BYP DESC CLN TO CUTAN NONAUT PE | |
| ICD-10 PCS | Descending | MIS | | | 0D1M4KM | BYP DESC CLN TO DESC CLN NONAUT PE | |
| ICD-10 PCS | Descending | MIS | | | 0D1M4Z4 | BYP DESC CLN TO CUTAN PE | |
| ICD-10 PCS | Descending | MIS | | | 0D1M4ZM | BYP DESC CLN TO DESC CLN PE | |
| ICD-10 PCS | Descending | MIS | | | 0DBM3ZZ | EXCISION DESC CLN PA | |
| ICD-10 PCS | Descending | MIS | | | 0DBM4ZZ | EXCISION DESC CLN PE | |
| ICD-10 PCS | Descending | MIS | | | 0DTM4ZZ | RECT DESC CLN PE | |
| ICD-10 PCS | Descending | NAO | | | 0D1H87M | BYP CEC,DESC CLN W AUTOL NAT/ART OP ENDO | |
| ICD-10 PCS | Descending | NAO | | | 0D1H8JM | BYP CEC,DESC CLN SYN VIA NAT/ART OP ENDO | |
| ICD-10 PCS | Descending | NAO | | | 0D1H8KM | BYP CEC,DESC CLN NONAUT NAT/ART OP ENDO | |
| ICD-10 PCS | Descending | NAO | | | 0D1H8ZM | BYP CEC TO DESC CLN NAT/ART OP ENDO | |
| ICD-10 PCS | Descending | NAO | | | 0D1K87M | BYP ASC CLN,DESC CLN AUTOL NAT/ART ENDO | |
| ICD-10 PCS | Descending | NAO | | | 0D1K8JM | BYP ASC CLN,DESC CLN SYN NAT/ART OP ENDO | |
| ICD-10 PCS | Descending | NAO | | | 0D1K8KM | BYP ASC CLN,DESC CLN NONAUT NAT/ART ENDO | |
| ICD-10 PCS | Descending | NAO | | | 0D1K8ZM | BYP ASC CLN,DESC CLN VIA NAT/ART OP ENDO | |
| ICD-10 PCS | Descending | NAO | | | 0D1L87M | BYP TRAN CLN,DESC CLN AUTOL NAT/ART ENDO | |
| ICD-10 PCS | Descending | NAO | | | 0D1L8JM | BYP TRAN CLN,DESC CLN SYN NAT/ART ENDO | |
| ICD-10 PCS | Descending | NAO | | | 0D1L8KM | BYP TRAN CLN,DESC CLN NONAUT NAT/ART END | |
| ICD-10 PCS | Descending | NAO | | | 0D1L8ZM | BYP TRAN CLN,DESC CLN NAT/ART OP ENDO | |
| ICD-10 PCS | Descending | NAO | | | 0D1M874 | BYP DESC CLN,CUTAN W AUTOL NAT/ART ENDO | |
| ICD-10 PCS | Descending | NAO | | | 0D1M87M | BYP DESC CLN,DESC CLN AUTOL NAT/ART ENDO | |
| ICD-10 PCS | Descending | NAO | | | 0D1M8J4 | BYP DESC CLN,CUTAN SYN VIA NAT/ART ENDO | |
| ICD-10 PCS | Descending | NAO | | | 0D1M8JM | BYP DESC CLN,DESC CLN SYN NAT/ART ENDO | |
| ICD-10 PCS | Descending | NAO | | | 0D1M8K4 | BYP DESC CLN,CUTAN NONAUT NAT/ART ENDO | |
| ICD-10 PCS | Descending | NAO | | | 0D1M8KM | BYP DESC CLN,DESC CLN NONAUT NAT/ART END | |
| ICD-10 PCS | Descending | NAO | | | 0D1M8Z4 | BYP DESC CLN CUTAN NAT/ART OP ENDO | |
| ICD-10 PCS | Descending | NAO | | | 0D1M8ZM | BYP DESC CLN,DESC CLN NAT/ART OP ENDO | |
| ICD-10 PCS | Descending | NAO | | | 0DTM7ZZ | RECT DESC CLN VIA NAT/ART OP | |
| ICD-10 PCS | Descending | NAO | | | 0DTM8ZZ | RECT DESC CLN VIA NAT/ART OP ENDO | |
| ICD-10 PCS | Descending | NAO | | | 0DTMFZZ | RECT DESC CLN VIA NAT/ART OP W PEAASST | |
| ICD-10 PCS | Descending | Open | | | 0D1H07M | BYP CEC TO DESC CLN W AUTOL TISS SUB OA | |
| ICD-10 PCS | Descending | Open | | | 0D1H0JM | BYP CEC TO DESC CLN SYN OA | |
| ICD-10 PCS | Descending | Open | | | 0D1H0KM | BYP CEC TO DESC CLN NONAUT OA | |
| ICD-10 PCS | Descending | Open | | | 0D1H0ZM | BYP CEC TO DESC CLN OA | |
| ICD-10 PCS | Descending | Open | | | 0D1K07M | BYP ASC CLN TO DESC CLN W AUTOL TISS OA | |
| ICD-10 PCS | Descending | Open | | | 0D1K0JM | BYP ASC CLN TO DESC CLN SYN OA | |
| ICD-10 PCS | Descending | Open | | | 0D1K0KM | BYP ASC CLN TO DESC CLN NONAUT OA | |
| ICD-10 PCS | Descending | Open | | | 0D1K0ZM | BYP ASC CLN TO DESC CLN OA | |
| ICD-10 PCS | Descending | Open | | | 0D1L07M | BYP TRAN CLN TO DESC CLN W AUTOL TISS OA | |
| ICD-10 PCS | Descending | Open | | | 0D1L0JM | BYP TRAN CLN TO DESC CLN SYN OA | |
| ICD-10 PCS | Descending | Open | | | 0D1L0KM | BYP TRAN CLN TO DESC CLN NONAUT OA | |
| ICD-10 PCS | Descending | Open | | | 0D1L0ZM | BYP TRAN CLN TO DESC CLN OA | |
| ICD-10 PCS | Descending | Open | | | 0D1M074 | BYP DESC CLN TO CUTAN AUTOL TISS SUB OA | |
| ICD-10 PCS | Descending | Open | | | 0D1M07M | BYP DESC CLN TO DESC CLN W AUTOL TISS OA | |
| ICD-10 PCS | Descending | Open | | | 0D1M0J4 | BYP DESC CLN TO CUTAN SYN OA | |
| ICD-10 PCS | Descending | Open | | | 0D1M0JM | BYP DESC CLN TO DESC CLN SYN OA | |
| ICD-10 PCS | Descending | Open | | | 0D1M0K4 | BYP DESC CLN TO CUTAN NONAUT OA | |
| ICD-10 PCS | Descending | Open | | | 0D1M0KM | BYP DESC CLN TO DESC CLN NONAUT OA | |
| ICD-10 PCS | Descending | Open | | | 0D1M0Z4 | BYP DESC CLN TO CUTAN OA | |
| ICD-10 PCS | Descending | Open | | | 0D1M0ZM | BYP DESC CLN TO DESC CLN OA | |
| ICD-10 PCS | Descending | Open | | | 0DBM0ZZ | EXCISION DESC CLN OA | |
| ICD-10 PCS | Descending | Open | | | 0DTM0ZZ | RECT DESC CLN OA | |
| ICD-10 PCS | Large intestine, left | MIS | | | 0DBG3ZZ | EXCISION L LG INTEST PA | |
| ICD-10 PCS | Large intestine, left | MIS | | | 0DBG4ZZ | EXCISION L LG INTEST PE | |
| ICD-10 PCS | Large intestine, left | MIS | | | 0DTG4ZZ | RECT L LG INTEST PE | |
| ICD-10 PCS | Large intestine, left | NAO | | | 0DTG7ZZ | RECT L LG INTEST VIA NAT/ART OP | |
| ICD-10 PCS | Large intestine, left | NAO | | | 0DTG8ZZ | RECT L LG INTEST VIA NAT/ART OP ENDO | |
| ICD-10 PCS | Large intestine, left | NAO | | | 0DTGFZZ | RECT L LG INTEST NAT/ART OP W PEAASST | |
| ICD-10 PCS | Large intestine, left | Open | | | 0DBG0ZZ | EXCISION L LG INTEST OA | |
| ICD-10 PCS | Large intestine, left | Open | | | 0DTG0ZZ | RECT L LG INTEST OA | |
| ICD-10 PCS | Large intestine, nos | MIS | | | 0DBE3ZZ | EXCISION LG INTEST PA | |
| ICD-10 PCS | Large intestine, nos | MIS | | | 0DBE4ZZ | EXCISION LG INTEST PE | |
| ICD-10 PCS | Large intestine, nos | MIS | | | 0DTE4ZZ | RECT LG INTEST PE | |
| ICD-10 PCS | Large intestine, nos | MIS | | | 0DWE47Z | REVIS AUTOL TISS SUB LG INTEST PE | |
| ICD-10 PCS | Large intestine, nos | MIS | | | 0DWE4JZ | REVIS SYN SUB IN LG INTEST PE | |
| ICD-10 PCS | Large intestine, nos | MIS | | | 0DWE4KZ | REVIS NONAUT TISS LG INTEST PE | |
| ICD-10 PCS | Large intestine, nos | NAO | | | 0DTE7ZZ | RECT LG INTEST VIA NAT/ART OP | |
| ICD-10 PCS | Large intestine, nos | NAO | | | 0DTE8ZZ | RECT LG INTEST VIA NAT/ART OP ENDO | |
| ICD-10 PCS | Large intestine, nos | NAO | | | 0DWE77Z | REVIS AUTOL TISS LG INTEST NAT/ART OP | |
| ICD-10 PCS | Large intestine, nos | NAO | | | 0DWE7JZ | REVIS SYN SUB LG INTEST VIA NAT/ART OP | |
| ICD-10 PCS | Large intestine, nos | NAO | | | 0DWE7KZ | REVIS NONAUT TISS LG INTEST NAT/ART OP | |
| ICD-10 PCS | Large intestine, nos | NAO | | | 0DWE87Z | REVIS AUTOL TISS LG INTEST NAT/ART ENDO | |
| ICD-10 PCS | Large intestine, nos | NAO | | | 0DWE8JZ | REVIS SYN LG INTEST NAT/ART OP ENDO | |
| ICD-10 PCS | Large intestine, nos | NAO | | | 0DWE8KZ | REVIS NONAUT TISS LG INTEST NAT/ART ENDO | |
| ICD-10 PCS | Large intestine, nos | Open | | | 0DBE0ZZ | EXCISION LG INTEST OA | |
| ICD-10 PCS | Large intestine, nos | Open | | | 0DTE0ZZ | RECT LG INTEST OA | |
| ICD-10 PCS | Large intestine, nos | Open | | | 0DWE07Z | REVIS AUTOL TISS SUB IN LG INTEST OA | |
| ICD-10 PCS | Large intestine, nos | Open | | | 0DWE0JZ | REVIS SYN SUB IN LG INTEST OA | |
| ICD-10 PCS | Large intestine, nos | Open | | | 0DWE0KZ | REVIS NONAUT TISS SUB IN LG INTEST OA | |
| ICD-10 PCS | Large intestine, right | MIS | | | 0DBF3ZZ | EXCISION R LG INTEST PA | |
| ICD-10 PCS | Large intestine, right | MIS | | | 0DBF4ZZ | EXCISION R LG INTEST PE | |
| ICD-10 PCS | Large intestine, right | Open | | | 0DBF0ZZ | EXCISION R LG INTEST OA | |
| ICD-10 PCS | Large intestine, right | MIS | | | 0DTF4ZZ | RECT R LG INTEST PE | |
| ICD-10 PCS | Large intestine, right | NAO | | | 0DTF7ZZ | RECT R LG INTEST VIA NAT/ART OP | |
| ICD-10 PCS | Large intestine, right | NAO | | | 0DTF8ZZ | RECT R LG INTEST VIA NAT/ART OP ENDO | |
| ICD-10 PCS | Large intestine, right | Open | | | 0DTF0ZZ | RECT R LG INTEST OA | |
| ICD-10 PCS | Rectum/anus | MIS | | | 0D1A47P | BYP JEJ TO RECTUM W AUTOL TISS PE | |
| ICD-10 PCS | Rectum/anus | MIS | | | 0D1A4JP | BYP JEJ TO RECTUM SYN PE | |
| ICD-10 PCS | Rectum/anus | MIS | | | 0D1A4KP | BYP JEJ TO RECTUM NONAUT PE | |
| ICD-10 PCS | Rectum/anus | MIS | | | 0D1A4ZP | BYP JEJ TO RECTUM PE | |
| ICD-10 PCS | Rectum/anus | MIS | | | 0D1B47P | BYP ILUM TO RECTUM W AUTOL TISS PE | |
| ICD-10 PCS | Rectum/anus | MIS | | | 0D1B4JP | BYP ILUM TO RECTUM SYN PE | |
| ICD-10 PCS | Rectum/anus | MIS | | | 0D1B4KP | BYP ILUM TO RECTUM NONAUT PE | |
| ICD-10 PCS | Rectum/anus | MIS | | | 0D1B4ZP | BYP ILUM TO RECTUM PE | |
| ICD-10 PCS | Rectum/anus | MIS | | | 0D1H47P | BYP CEC TO RECTUM W AUTOL TISS PE | |
| ICD-10 PCS | Rectum/anus | MIS | | | 0D1H4JP | BYP CEC TO RECTUM SYN PE | |
| ICD-10 PCS | Rectum/anus | MIS | | | 0D1H4KP | BYP CEC TO RECTUM NONAUT PE | |
| ICD-10 PCS | Rectum/anus | MIS | | | 0D1H4ZP | BYP CEC TO RECTUM PE | |
| ICD-10 PCS | Rectum/anus | MIS | | | 0D1K47P | BYP ASC CLN,RECTUM W AUTOL TISS SUB PE | |
| ICD-10 PCS | Rectum/anus | MIS | | | 0D1K4JP | BYP ASC CLN TO RECTUM SYN PE | |
| ICD-10 PCS | Rectum/anus | MIS | | | 0D1K4KP | BYP ASC CLN TO RECTUM NONAUT PE | |
| ICD-10 PCS | Rectum/anus | MIS | | | 0D1K4ZP | BYP ASC CLN TO RECTUM PE | |
| ICD-10 PCS | Rectum/anus | MIS | | | 0D1L47P | BYP TRAN CLN,RECTUM W AUTOL TISS SUB PE | |
| ICD-10 PCS | Rectum/anus | MIS | | | 0D1L4JP | BYP TRAN CLN TO RECTUM SYN PE | |
| ICD-10 PCS | Rectum/anus | MIS | | | 0D1L4KP | BYP TRAN CLN TO RECTUM NONAUT PE | |
| ICD-10 PCS | Rectum/anus | MIS | | | 0D1L4ZP | BYP TRAN CLN TO RECTUM PE | |
| ICD-10 PCS | Rectum/anus | MIS | | | 0D1M47P | BYP DESC CLN,RECTUM W AUTOL TISS SUB PE | |
| ICD-10 PCS | Rectum/anus | MIS | | | 0D1M4JP | BYP DESC CLN TO RECTUM SYN PE | |
| ICD-10 PCS | Rectum/anus | MIS | | | 0D1M4KP | BYP DESC CLN TO RECTUM NONAUT PE | |
| ICD-10 PCS | Rectum/anus | MIS | | | 0D1M4ZP | BYP DESC CLN TO RECTUM PE | |
| ICD-10 PCS | Rectum/anus | MIS | | | 0D1N47P | BYP SIGM CLN,RECTUM W AUTOL TISS SUB PE | |
| ICD-10 PCS | Rectum/anus | MIS | | | 0D1N4JP | BYP SIGM CLN TO RECTUM SYN PE | |
| ICD-10 PCS | Rectum/anus | MIS | | | 0D1N4KP | BYP SIGM CLN TO RECTUM NONAUT PE | |
| ICD-10 PCS | Rectum/anus | MIS | | | 0D1N4ZP | BYP SIGM CLN TO RECTUM PE | |
| ICD-10 PCS | Rectum/anus | MIS | | | 0DBP4ZZ | EXCISION RECTUM PE | |
| ICD-10 PCS | Rectum/anus | MIS | | | 0DSP4ZZ | REPOS RECTUM PE | |
| ICD-10 PCS | Rectum/anus | MIS | | | 0DTP4ZZ | RECT RECTUM PE | |
| ICD-10 PCS | Rectum/anus | NAO | | | 0D1A87P | BYP JEJ,RECTUM W AUTOL NAT/ART OP ENDO | |
| ICD-10 PCS | Rectum/anus | NAO | | | 0D1A8JP | BYP JEJ,RECTUM SYN VIA NAT/ART OP ENDO | |
| ICD-10 PCS | Rectum/anus | NAO | | | 0D1A8KP | BYP JEJ,RECTUM NONAUT NAT/ART OP ENDO | |
| ICD-10 PCS | Rectum/anus | NAO | | | 0D1A8ZP | BYP JEJ TO RECTUM NAT/ART OP ENDO | |
| ICD-10 PCS | Rectum/anus | NAO | | | 0D1B87P | BYP ILUM,RECTUM W AUTOL NAT/ART OP ENDO | |
| ICD-10 PCS | Rectum/anus | NAO | | | 0D1B8JP | BYP ILUM,RECTUM SYN VIA NAT/ART OP ENDO | |
| ICD-10 PCS | Rectum/anus | NAO | | | 0D1B8KP | BYP ILUM,RECTUM NONAUT NAT/ART OP ENDO | |
| ICD-10 PCS | Rectum/anus | NAO | | | 0D1B8ZP | BYP ILUM RECTUM NAT/ART OP ENDO | |
| ICD-10 PCS | Rectum/anus | NAO | | | 0D1H87P | BYP CEC,RECTUM W AUTOL NAT/ART OP ENDO | |
| ICD-10 PCS | Rectum/anus | NAO | | | 0D1H8JP | BYP CEC,RECTUM SYN VIA NAT/ART OP ENDO | |
| ICD-10 PCS | Rectum/anus | NAO | | | 0D1H8KP | BYP CEC,RECTUM NONAUT NAT/ART OP ENDO | |
| ICD-10 PCS | Rectum/anus | NAO | | | 0D1H8ZP | BYP CEC TO RECTUM NAT/ART OP ENDO | |
| ICD-10 PCS | Rectum/anus | NAO | | | 0D1K87P | BYP ASC CLN,RECTUM AUTOL NAT/ART OP ENDO | |
| ICD-10 PCS | Rectum/anus | NAO | | | 0D1K8JP | BYP ASC CLN,RECTUM SYN NAT/ART OP ENDO | |
| ICD-10 PCS | Rectum/anus | NAO | | | 0D1K8KP | BYP ASC CLN,RECTUM NONAUT NAT/ART ENDO | |
| ICD-10 PCS | Rectum/anus | NAO | | | 0D1K8ZP | BYP ASC CLN RECTUM NAT/ART OP ENDO | |
| ICD-10 PCS | Rectum/anus | NAO | | | 0D1L87P | BYP TRAN CLN,RECTUM AUTOL NAT/ART ENDO | |
| ICD-10 PCS | Rectum/anus | NAO | | | 0D1L8JP | BYP TRAN CLN,RECTUM SYN NAT/ART ENDO | |
| ICD-10 PCS | Rectum/anus | NAO | | | 0D1L8KP | BYP TRAN CLN,RECTUM NONAUT NAT/ART ENDO | |
| ICD-10 PCS | Rectum/anus | NAO | | | 0D1L8ZP | BYP TRAN CLN TO RECTUM NAT/ART ENDO | |
| ICD-10 PCS | Rectum/anus | NAO | | | 0D1M87P | BYP DESC CLN,RECTUM AUTOL NAT/ART ENDO | |
| ICD-10 PCS | Rectum/anus | NAO | | | 0D1M8JP | BYP DESC CLN,RECTUM SYN NAT/ART OP ENDO | |
| ICD-10 PCS | Rectum/anus | NAO | | | 0D1M8KP | BYP DESC CLN,RECTUM NONAUT NAT/ART ENDO | |
| ICD-10 PCS | Rectum/anus | NAO | | | 0D1M8ZP | BYP DESC CLN TO RECTUM NAT/ART ENDO | |
| ICD-10 PCS | Rectum/anus | NAO | | | 0D1N87P | BYP SIGM CLN,RECTUM W AUTOL NAT/ART ENDO | |
| ICD-10 PCS | Rectum/anus | NAO | | | 0D1N8JP | BYP SIGM CLN,RECTUM SYN NAT/ART ENDO | |
| ICD-10 PCS | Rectum/anus | NAO | | | 0D1N8KP | BYP SIGM CLN,RECTUM NONAUT NAT/ART ENDO | |
| ICD-10 PCS | Rectum/anus | NAO | | | 0D1N8ZP | BYP SIGM CLN TO RECTUM NAT/ART ENDO | |
| ICD-10 PCS | Rectum/anus | NAO | | | 0DSP7ZZ | REPOS RECTUM VIA NAT/ART OP | |
| ICD-10 PCS | Rectum/anus | NAO | | | 0DSP8ZZ | REPOS RECTUM VIA NAT/ART OP ENDO | |
| ICD-10 PCS | Rectum/anus | NAO | | | 0DTP7ZZ | RECT RECTUM VIA NAT/ART OP | |
| ICD-10 PCS | Rectum/anus | NAO | | | 0DTP8ZZ | RECT RECTUM VIA NAT/ART OP ENDO | |
| ICD-10 PCS | Rectum/anus | Open | | | 0D1A07P | BYP JEJ TO RECTUM W AUTOL TISS SUB OA | |
| ICD-10 PCS | Rectum/anus | Open | | | 0D1A0JP | BYP JEJ TO RECTUM SYN OA | |
| ICD-10 PCS | Rectum/anus | Open | | | 0D1A0KP | BYP JEJ TO RECTUM NONAUT OA | |
| ICD-10 PCS | Rectum/anus | Open | | | 0D1A0ZP | BYP JEJ TO RECTUM OA | |
| ICD-10 PCS | Rectum/anus | Open | | | 0D1B07P | BYP ILUM TO RECTUM W AUTOL TISS SUB OA | |
| ICD-10 PCS | Rectum/anus | Open | | | 0D1B0JP | BYP ILUM TO RECTUM SYN OA | |
| ICD-10 PCS | Rectum/anus | Open | | | 0D1B0KP | BYP ILUM TO RECTUM NONAUT OA | |
| ICD-10 PCS | Rectum/anus | Open | | | 0D1B0ZP | BYP ILUM TO RECTUM OA | |
| ICD-10 PCS | Rectum/anus | Open | | | 0D1H07P | BYP CEC TO RECTUM W AUTOL TISS SUB OA | |
| ICD-10 PCS | Rectum/anus | Open | | | 0D1H0JP | BYP CEC TO RECTUM SYN OA | |
| ICD-10 PCS | Rectum/anus | Open | | | 0D1H0KP | BYP CEC TO RECTUM NONAUT OA | |
| ICD-10 PCS | Rectum/anus | Open | | | 0D1H0ZP | BYP CEC TO RECTUM OA | |
| ICD-10 PCS | Rectum/anus | Open | | | 0D1K07P | BYP ASC CLN TO RECTUM AUTOL TISS SUB OA | |
| ICD-10 PCS | Rectum/anus | Open | | | 0D1K0JP | BYP ASC CLN TO RECTUM SYN OA | |
| ICD-10 PCS | Rectum/anus | Open | | | 0D1K0KP | BYP ASC CLN TO RECTUM NONAUT OA | |
| ICD-10 PCS | Rectum/anus | Open | | | 0D1K0ZP | BYP ASC CLN TO RECTUM OA | |
| ICD-10 PCS | Rectum/anus | Open | | | 0D1L07P | BYP TRAN CLN RECTUM AUTOL TISS SUB OA | |
| ICD-10 PCS | Rectum/anus | Open | | | 0D1L0JP | BYP TRAN CLN TO RECTUM SYN OA | |
| ICD-10 PCS | Rectum/anus | Open | | | 0D1L0KP | BYP TRAN CLN TO RECTUM NONAUT OA | |
| ICD-10 PCS | Rectum/anus | Open | | | 0D1L0ZP | BYP TRAN CLN TO RECTUM OA | |
| ICD-10 PCS | Rectum/anus | Open | | | 0D1M07P | BYP DESC CLN RECTUM AUTOL TISS SUB OA | |
| ICD-10 PCS | Rectum/anus | Open | | | 0D1M0JP | BYP DESC CLN TO RECTUM SYN OA | |
| ICD-10 PCS | Rectum/anus | Open | | | 0D1M0KP | BYP DESC CLN TO RECTUM NONAUT OA | |
| ICD-10 PCS | Rectum/anus | Open | | | 0D1M0ZP | BYP DESC CLN TO RECTUM OA | |
| ICD-10 PCS | Rectum/anus | Open | | | 0D1N07P | BYP SIGM CLN RECTUM AUTOL TISS SUB OA | |
| ICD-10 PCS | Rectum/anus | Open | | | 0D1N0JP | BYP SIGM CLN TO RECTUM SYN OA | |
| ICD-10 PCS | Rectum/anus | Open | | | 0D1N0KP | BYP SIGM CLN TO RECTUM NONAUT OA | |
| ICD-10 PCS | Rectum/anus | Open | | | 0D1N0ZP | BYP SIGM CLN TO RECTUM OA | |
| ICD-10 PCS | Rectum/anus | Open | | | 0DBP0ZZ | EXCISION RECTUM OA | |
| ICD-10 PCS | Rectum/anus | Open | | | 0DSP0ZZ | REPOS RECTUM OA | |
| ICD-10 PCS | Rectum/anus | Open | | | 0DTP0ZZ | RECT RECTUM OA | |
| ICD-10 PCS | Sigmoid | MIS | | | 0D1H47N | BYP CEC TO SIGM CLN AUTOL TISS PE | |
| ICD-10 PCS | Sigmoid | MIS | | | 0D1H4JN | BYP CEC TO SIGM CLN SYN PE | |
| ICD-10 PCS | Sigmoid | MIS | | | 0D1H4KN | BYP CEC TO SIGM CLN NONAUT PE | |
| ICD-10 PCS | Sigmoid | MIS | | | 0D1H4ZN | BYP CEC TO SIGM CLN PE | |
| ICD-10 PCS | Sigmoid | MIS | | | 0D1K47N | BYP ASC CLN,SIGM CLN AUTOL TISS SUB PE | |
| ICD-10 PCS | Sigmoid | MIS | | | 0D1K4JN | BYP ASC CLN TO SIGM CLN SYN PE | |
| ICD-10 PCS | Sigmoid | MIS | | | 0D1K4KN | BYP ASC CLN TO SIGM CLN NONAUT PE | |
| ICD-10 PCS | Sigmoid | MIS | | | 0D1K4ZN | BYP ASC CLN TO SIGM CLN PE | |
| ICD-10 PCS | Sigmoid | MIS | | | 0D1L47N | BYP TRAN CLN,SIGM CLN W AUTOL PE | |
| ICD-10 PCS | Sigmoid | MIS | | | 0D1L4JN | BYP TRAN CLN TO SIGM CLN SYN PE | |
| ICD-10 PCS | Sigmoid | MIS | | | 0D1L4KN | BYP TRAN CLN TO SIGM CLN NONAUT PE | |
| ICD-10 PCS | Sigmoid | MIS | | | 0D1L4ZN | BYP TRAN CLN TO SIGM CLN PE | |
| ICD-10 PCS | Sigmoid | MIS | | | 0D1M47N | BYP DESC CLN,SIGM CLN AUTOL TISS SUB PE | |
| ICD-10 PCS | Sigmoid | MIS | | | 0D1M4JN | BYP DESC CLN TO SIGM CLN SYN PE | |
| ICD-10 PCS | Sigmoid | MIS | | | 0D1M4KN | BYP DESC CLN TO SIGM CLN NONAUT PE | |
| ICD-10 PCS | Sigmoid | MIS | | | 0D1M4ZN | BYP DESC CLN TO SIGM CLN PE | |
| ICD-10 PCS | Sigmoid | MIS | | | 0D1N3J4 | BYP SIGM CLN TO CUTAN SYN PA | |
| ICD-10 PCS | Sigmoid | MIS | | | 0D1N474 | BYP SIGM CLN,CUTAN W AUTOL TISS SUB PE | |
| ICD-10 PCS | Sigmoid | MIS | | | 0D1N47N | BYP SIGM CLN,SIGM CLN W AUTOL PE | |
| ICD-10 PCS | Sigmoid | MIS | | | 0D1N4J4 | BYP SIGM CLN TO CUTAN SYN PE | |
| ICD-10 PCS | Sigmoid | MIS | | | 0D1N4JN | BYP SIGM CLN TO SIGM CLN SYN PE | |
| ICD-10 PCS | Sigmoid | MIS | | | 0D1N4K4 | BYP SIGM CLN TO CUTAN NONAUT PE | |
| ICD-10 PCS | Sigmoid | MIS | | | 0D1N4KN | BYP SIGM CLN TO SIGM CLN NONAUT PE | |
| ICD-10 PCS | Sigmoid | MIS | | | 0D1N4Z4 | BYP SIGM CLN TO CUTAN PE | |
| ICD-10 PCS | Sigmoid | MIS | | | 0D1N4ZN | BYP SIGM CLN TO SIGM CLN PE | |
| ICD-10 PCS | Sigmoid | MIS | | | 0DBN3ZZ | EXCISION SIGM CLN PA | |
| ICD-10 PCS | Sigmoid | MIS | | | 0DBN4ZZ | EXCISION SIGM CLN PE | |
| ICD-10 PCS | Sigmoid | MIS | | | 0DTN4ZZ | RECT SIGM CLN PE | |
| ICD-10 PCS | Sigmoid | NAO | | | 0D1H87N | BYP CEC,SIGM CLN W AUTOL NAT/ART OP ENDO | |
| ICD-10 PCS | Sigmoid | NAO | | | 0D1H8JN | BYP CEC,SIGM CLN SYN VIA NAT/ART OP ENDO | |
| ICD-10 PCS | Sigmoid | NAO | | | 0D1H8KN | BYP CEC,SIGM CLN NONAUT NAT/ART OP ENDO | |
| ICD-10 PCS | Sigmoid | NAO | | | 0D1H8ZN | BYP CEC TO SIGM CLN NAT/ART OP ENDO | |
| ICD-10 PCS | Sigmoid | NAO | | | 0D1K87N | BYP ASC CLN,SIGM CLN AUTOL NAT/ART ENDO | |
| ICD-10 PCS | Sigmoid | NAO | | | 0D1K8JN | BYP ASC CLN,SIGM CLN SYN NAT/ART OP ENDO | |
| ICD-10 PCS | Sigmoid | NAO | | | 0D1K8KN | BYP ASC CLN,SIGM CLN NONAUT NAT/ART ENDO | |
| ICD-10 PCS | Sigmoid | NAO | | | 0D1K8ZN | BYP ASC CLN,SIGM CLN VIA NAT/ART OP ENDO | |
| ICD-10 PCS | Sigmoid | NAO | | | 0D1L87N | BYP TRAN CLN,SIGM CLN AUTOL NAT/ART ENDO | |
| ICD-10 PCS | Sigmoid | NAO | | | 0D1L8JN | BYP TRAN CLN,SIGM CLN SYN NAT/ART ENDO | |
| ICD-10 PCS | Sigmoid | NAO | | | 0D1L8KN | BYP TRAN CLN,SIGM CLN NONAUT NAT/ART END | |
| ICD-10 PCS | Sigmoid | NAO | | | 0D1L8ZN | BYP TRAN CLN,SIGM CLN NAT/ART OP ENDO | |
| ICD-10 PCS | Sigmoid | NAO | | | 0D1M87N | BYP DESC CLN,SIGM CLN AUTOL NAT/ART ENDO | |
| ICD-10 PCS | Sigmoid | NAO | | | 0D1M8JN | BYP DESC CLN,SIGM CLN SYN NAT/ART ENDO | |
| ICD-10 PCS | Sigmoid | NAO | | | 0D1M8KN | BYP DESC CLN,SIGM NONAUT NAT/ART OP ENDO | |
| ICD-10 PCS | Sigmoid | NAO | | | 0D1M8ZN | BYP DESC CLN,SIGM CLN NAT/ART OP ENDO | |
| ICD-10 PCS | Sigmoid | NAO | | | 0D1N874 | BYP SIGM CLN,CUTAN W AUTOL NAT/ART ENDO | |
| ICD-10 PCS | Sigmoid | NAO | | | 0D1N87N | BYP SIGM CLN,SIGM CLN AUTOL NAT/ART END | |
| ICD-10 PCS | Sigmoid | NAO | | | 0D1N8J4 | BYP SIGM CLN,CUTAN SYN NAT/ART ENDO | |
| ICD-10 PCS | Sigmoid | NAO | | | 0D1N8JN | BYP SIGM CLN,SIGM CLN SYN NAT/ART ENDO | |
| ICD-10 PCS | Sigmoid | NAO | | | 0D1N8K4 | BYP SIGM CLN,CUTAN NONAUT NAT/ART ENDO | |
| ICD-10 PCS | Sigmoid | NAO | | | 0D1N8KN | BYP SIGM CLN,SIGM CLN NONAUT NAT/ART END | |
| ICD-10 PCS | Sigmoid | NAO | | | 0D1N8Z4 | BYP SIGM CLN CUTAN NAT/ART OP ENDO | |
| ICD-10 PCS | Sigmoid | NAO | | | 0D1N8ZN | BYP SIGM CLN,SIGM CLN NAT/ART OP ENDO | |
| ICD-10 PCS | Sigmoid | NAO | | | 0DTN7ZZ | RECT SIGM CLN VIA NAT/ART OP | |
| ICD-10 PCS | Sigmoid | NAO | | | 0DTN8ZZ | RECT SIGM CLN VIA NAT/ART OP ENDO | |
| ICD-10 PCS | Sigmoid | NAO | | | 0DTNFZZ | RECT SIGM CLN VIA NAT/ART OP W PEAASST | |
| ICD-10 PCS | Sigmoid | Open | | | 0D1H07N | BYP CEC TO SIGM CLN W AUTOL TISS SUB OA | |
| ICD-10 PCS | Sigmoid | Open | | | 0D1H0JN | BYP CEC TO SIGM CLN SYN OA | |
| ICD-10 PCS | Sigmoid | Open | | | 0D1H0KN | BYP CEC TO SIGM CLN NONAUT OA | |
| ICD-10 PCS | Sigmoid | Open | | | 0D1H0ZN | BYP CEC TO SIGM CLN OA | |
| ICD-10 PCS | Sigmoid | Open | | | 0D1K07N | BYP ASC CLN TO SIGM CLN W AUTOL TISS OA | |
| ICD-10 PCS | Sigmoid | Open | | | 0D1K0JN | BYP ASC CLN TO SIGM CLN SYN OA | |
| ICD-10 PCS | Sigmoid | Open | | | 0D1K0KN | BYP ASC CLN TO SIGM CLN NONAUT OA | |
| ICD-10 PCS | Sigmoid | Open | | | 0D1K0ZN | BYP ASC CLN TO SIGM CLN OA | |
| ICD-10 PCS | Sigmoid | Open | | | 0D1L07N | BYP TRAN CLN TO SIGM CLN W AUTOL TISS OA | |
| ICD-10 PCS | Sigmoid | Open | | | 0D1L0JN | BYP TRAN CLN TO SIGM CLN SYN OA | |
| ICD-10 PCS | Sigmoid | Open | | | 0D1L0KN | BYP TRAN CLN TO SIGM CLN NONAUT OA | |
| ICD-10 PCS | Sigmoid | Open | | | 0D1L0ZN | BYP TRAN CLN TO SIGM CLN OA | |
| ICD-10 PCS | Sigmoid | Open | | | 0D1M07N | BYP DESC CLN TO SIGM CLN W AUTOL TISS OA | |
| ICD-10 PCS | Sigmoid | Open | | | 0D1M0JN | BYP DESC CLN TO SIGM CLN SYN OA | |
| ICD-10 PCS | Sigmoid | Open | | | 0D1M0KN | BYP DESC CLN TO SIGM CLN NONAUT OA | |
| ICD-10 PCS | Sigmoid | Open | | | 0D1M0ZN | BYP DESC CLN TO SIGM CLN OA | |
| ICD-10 PCS | Sigmoid | Open | | | 0D1N074 | BYP SIGM CLN TO CUTAN AUTOL TISS SUB OA | |
| ICD-10 PCS | Sigmoid | Open | | | 0D1N07N | BYP SIGM CLN TO SIGM CLN W AUTOL TISS OA | |
| ICD-10 PCS | Sigmoid | Open | | | 0D1N0J4 | BYP SIGM CLN TO CUTAN SYN OA | |
| ICD-10 PCS | Sigmoid | Open | | | 0D1N0JN | BYP SIGM CLN TO SIGM CLN SYN OA | |
| ICD-10 PCS | Sigmoid | Open | | | 0D1N0K4 | BYP SIGM CLN TO CUTAN NONAUT OA | |
| ICD-10 PCS | Sigmoid | Open | | | 0D1N0KN | BYP SIGM CLN TO SIGM CLN NONAUT OA | |
| ICD-10 PCS | Sigmoid | Open | | | 0D1N0Z4 | BYP SIGM CLN TO CUTAN OA | |
| ICD-10 PCS | Sigmoid | Open | | | 0D1N0ZN | BYP SIGM CLN TO SIGM CLN OA | |
| ICD-10 PCS | Sigmoid | Open | | | 0DBN0ZZ | EXCISION SIGM CLN OA | |
| ICD-10 PCS | Sigmoid | Open | | | 0DTN0ZZ | RECT SIGM CLN OA | |
| ICD-10 PCS | Transverse | MIS | | | 0D1H47L | BYP CEC TO TRAN CLN AUTOL TISS PE | |
| ICD-10 PCS | Transverse | MIS | | | 0D1H4JL | BYP CEC TO TRAN CLN SYN PE | |
| ICD-10 PCS | Transverse | MIS | | | 0D1H4KL | BYP CEC TO TRAN CLN NONAUT PE | |
| ICD-10 PCS | Transverse | MIS | | | 0D1H4ZL | BYP CEC TO TRAN CLN PE | |
| ICD-10 PCS | Transverse | MIS | | | 0D1K47L | BYP ASC CLN,TRAN CLN W AUTOL TISS SUB PE | |
| ICD-10 PCS | Transverse | MIS | | | 0D1K4JL | BYP ASC CLN TO TRAN CLN SYN PE | |
| ICD-10 PCS | Transverse | MIS | | | 0D1K4KL | BYP ASC CLN TO TRAN CLN NONAUT PE | |
| ICD-10 PCS | Transverse | MIS | | | 0D1K4ZL | BYP ASC CLN TO TRAN CLN PE | |
| ICD-10 PCS | Transverse | MIS | | | 0D1L3J4 | BYP TRAN CLN TO CUTAN SYN PA | |
| ICD-10 PCS | Transverse | MIS | | | 0D1L474 | BYP TRAN CLN,CUTAN W AUTOL TISS SUB PE | |
| ICD-10 PCS | Transverse | MIS | | | 0D1L47L | BYP TRAN CLN,TRAN CLN W AUTOL PE | |
| ICD-10 PCS | Transverse | MIS | | | 0D1L4J4 | BYP TRAN CLN TO CUTAN SYN PE | |
| ICD-10 PCS | Transverse | MIS | | | 0D1L4JL | BYP TRAN CLN TO TRAN CLN SYN PE | |
| ICD-10 PCS | Transverse | MIS | | | 0D1L4K4 | BYP TRAN CLN TO CUTAN NONAUT PE | |
| ICD-10 PCS | Transverse | MIS | | | 0D1L4KL | BYP TRAN CLN TO TRAN CLN NONAUT PE | |
| ICD-10 PCS | Transverse | MIS | | | 0D1L4Z4 | BYP TRAN CLN TO CUTAN PE | |
| ICD-10 PCS | Transverse | MIS | | | 0D1L4ZL | BYP TRAN CLN TO TRAN CLN PE | |
| ICD-10 PCS | Transverse | MIS | | | 0DBL3ZZ | EXCISION TRAN CLN PA | |
| ICD-10 PCS | Transverse | MIS | | | 0DBL4ZZ | EXCISION TRAN CLN PE | |
| ICD-10 PCS | Transverse | MIS | | | 0DTL4ZZ | RECT TRAN CLN PE | |
| ICD-10 PCS | Transverse | NAO | | | 0D1H87L | BYP CEC,TRAN CLN W AUTOL NAT/ART OP ENDO | |
| ICD-10 PCS | Transverse | NAO | | | 0D1H8JL | BYP CEC,TRAN CLN SYN VIA NAT/ART OP ENDO | |
| ICD-10 PCS | Transverse | NAO | | | 0D1H8KL | BYP CEC,TRAN CLN NONAUT NAT/ART OP ENDO | |
| ICD-10 PCS | Transverse | NAO | | | 0D1H8ZL | BYP CEC TO TRAN CLN NAT/ART OP ENDO | |
| ICD-10 PCS | Transverse | NAO | | | 0D1K87L | BYP ASC CLN,TRAN CLN AUTOL NAT/ART ENDO | |
| ICD-10 PCS | Transverse | NAO | | | 0D1K8JL | BYP ASC CLN,TRAN CLN SYN NAT/ART OP ENDO | |
| ICD-10 PCS | Transverse | NAO | | | 0D1K8KL | BYP ASC CLN,TRAN CLN NONAUT NAT/ART ENDO | |
| ICD-10 PCS | Transverse | NAO | | | 0D1K8ZL | BYP ASC CLN,TRAN CLN VIA NAT/ART OP ENDO | |
| ICD-10 PCS | Transverse | NAO | | | 0D1L874 | BYP TRAN CLN,CUTAN AUTOL NAT/ART ENDO | |
| ICD-10 PCS | Transverse | NAO | | | 0D1L87L | BYP TRAN CLN,TRAN CLN AUTOL NAT/ART ENDO | |
| ICD-10 PCS | Transverse | NAO | | | 0D1L8J4 | BYP TRAN CLN,CUTAN SYN NAT/ART OP ENDO | |
| ICD-10 PCS | Transverse | NAO | | | 0D1L8JL | BYP TRAN CLN,TRAN CLN SYN NAT/ART ENDO | |
| ICD-10 PCS | Transverse | NAO | | | 0D1L8K4 | BYP TRAN CLN,CUTAN NONAUT NAT/ART ENDO | |
| ICD-10 PCS | Transverse | NAO | | | 0D1L8KL | BYP TRAN CLN,TRAN CLN NONAUT NAT/ART END | |
| ICD-10 PCS | Transverse | NAO | | | 0D1L8Z4 | BYP TRAN CLN CUTAN NAT/ART OP ENDO | |
| ICD-10 PCS | Transverse | NAO | | | 0D1L8ZL | BYP TRAN CLN,TRAN CLN NAT/ART OP ENDO | |
| ICD-10 PCS | Transverse | NAO | | | 0DTL7ZZ | RECT TRAN CLN VIA NAT/ART OP | |
| ICD-10 PCS | Transverse | NAO | | | 0DTL8ZZ | RECT TRAN CLN VIA NAT/ART OP ENDO | |
| ICD-10 PCS | Transverse | NAO | | | 0DTLFZZ | RECT TRAN CLN VIA NAT/ART OP W PEAASST | |
| ICD-10 PCS | Transverse | Open | | | 0D1H07L | BYP CEC TO TRAN CLN W AUTOL TISS SUB OA | |
| ICD-10 PCS | Transverse | Open | | | 0D1H0JL | BYP CEC TO TRAN CLN SYN OA | |
| ICD-10 PCS | Transverse | Open | | | 0D1H0KL | BYP CEC TO TRAN CLN NONAUT OA | |
| ICD-10 PCS | Transverse | Open | | | 0D1H0ZL | BYP CEC TO TRAN CLN OA | |
| ICD-10 PCS | Transverse | Open | | | 0D1K07L | BYP ASC CLN TO TRAN CLN W AUTOL TISS OA | |
| ICD-10 PCS | Transverse | Open | | | 0D1K0JL | BYP ASC CLN TO TRAN CLN SYN OA | |
| ICD-10 PCS | Transverse | Open | | | 0D1K0KL | BYP ASC CLN TO TRAN CLN NONAUT OA | |
| ICD-10 PCS | Transverse | Open | | | 0D1K0ZL | BYP ASC CLN TO TRAN CLN OA | |
| ICD-10 PCS | Transverse | Open | | | 0D1L074 | BYP TRAN CLN TO CUTAN AUTOL TISS SUB OA | |
| ICD-10 PCS | Transverse | Open | | | 0D1L07L | BYP TRAN CLN TO TRAN CLN W AUTOL TISS OA | |
| ICD-10 PCS | Transverse | Open | | | 0D1L0J4 | BYP TRAN CLN TO CUTAN SYN OA | |
| ICD-10 PCS | Transverse | Open | | | 0D1L0JL | BYP TRAN CLN TO TRAN CLN SYN OA | |
| ICD-10 PCS | Transverse | Open | | | 0D1L0K4 | BYP TRAN CLN TO CUTAN NONAUT OA | |
| ICD-10 PCS | Transverse | Open | | | 0D1L0KL | BYP TRAN CLN TO TRAN CLN NONAUT OA | |
| ICD-10 PCS | Transverse | Open | | | 0D1L0Z4 | BYP TRAN CLN TO CUTAN OA | |
| ICD-10 PCS | Transverse | Open | | | 0D1L0ZL | BYP TRAN CLN TO TRAN CLN OA | |
| ICD-10 PCS | Transverse | Open | | | 0DBL0ZZ | EXCISION TRAN CLN OA | |
| ICD-10 PCS | Transverse | Open | | | 0DTL0ZZ | RECT TRAN CLN OA | |

| Complications | | | | |
| --- | --- | --- | --- | --- |
| Code Type | Code | Description | Complication Category |
| ICD-10-CM | N17.9 | AC KID FAIL UNSP | Acute Renal Failure |
| ICD-10-CM | N17.8 | OTH AC KID FAIL | Acute Renal Failure |
| ICD-10-CM | N17.0 | AC KID FAIL W TUBLR NECR | Acute Renal Failure |
| ICD-10-CM | N17.1 | AC KID FAIL W AC CORTICAL NECR | Acute Renal Failure |
| ICD-10-CM | N17.2 | AC KID FAIL W MEDULLARY NECR | Acute Renal Failure |
| ICD-10-CM | I46.9 | CARD ARREST CAUSE UNSP | Cardiac Arrest |
| ICD-10-CM | I60.32 | NTSAH FR L POSTERIOR COMMUN ARTERY | Cerebrovascular Accident |
| ICD-10-CM | I61.0 | NONTRM INTRCEREB HEMRG IN HEMIS SUBCO | Cerebrovascular Accident |
| ICD-10-CM | I63.09 | CEREB INFRC D/T THRMBO OTH PRECEREB ART | Cerebrovascular Accident |
| ICD-10-CM | I63.39 | CEREB INFRC D/T THRMBO OTH CEREB ART | Cerebrovascular Accident |
| ICD-10-CM | R29.703 | NIHSS SCORE 3 | Cerebrovascular Accident |
| ICD-10-CM | I63.321 | CEREB INFRC D/T THRMBO R ANT CEREB ART | Cerebrovascular Accident |
| ICD-10-CM | I63.02 | CEREB INFRC D/T THRMBO BASILAR ART | Cerebrovascular Accident |
| ICD-10-CM | I63.12 | CEREB INFRC D/T EMBLSM BASILAR ART | Cerebrovascular Accident |
| ICD-10-CM | I63.212 | CI D/T UNSP OCCL/STEN, L VERT ARTERY | Cerebrovascular Accident |
| ICD-10-CM | I63.522 | CI D/T UNSP OCLSN L ANTER CRBRL ART | Cerebrovascular Accident |
| ICD-10-CM | I66.21 | OCCLS&STEN R POSTR CEREB ART | Cerebrovascular Accident |
| ICD-10-CM | R29.720 | NIHSS SCORE 20 | Cerebrovascular Accident |
| ICD-10-CM | R29.728 | NIHSS SCORE 28 | Cerebrovascular Accident |
| ICD-10-CM | I60.52 | NONTRM SUBARC HEMRG FR L VERT ART | Cerebrovascular Accident |
| ICD-10-CM | I66.13 | OCCLS&STEN BILAT ANT CEREB ART | Cerebrovascular Accident |
| ICD-10-CM | I66.19 | OCCLS&STEN UNSP ANT CEREB ART | Cerebrovascular Accident |
| ICD-10-CM | I60.10 | NTSAH FR UNSP MID CEREBRAL ARTERY | Cerebrovascular Accident |
| ICD-10-CM | I60.7 | NONTRM SUBARC HEMRG FR UNSP INTRCRN ART | Cerebrovascular Accident |
| ICD-10-CM | I63.233 | CI D/T UNSP OCL/STN BIL CARTD ARTERY | Cerebrovascular Accident |
| ICD-10-CM | I63.322 | CEREB INFRC D/T THRMBO L ANT CEREB ART | Cerebrovascular Accident |
| ICD-10-CM | I63.329 | CI D/T THRMB OF UNSP ANT CRBRL ARTRY | Cerebrovascular Accident |
| ICD-10-CM | R29.707 | NIHSS SCORE 7 | Cerebrovascular Accident |
| ICD-10-CM | G43.609 | PERST MIG AURA W CI,NOT INTRCT,WO STA | Cerebrovascular Accident |
| ICD-10-CM | I63.313 | CI D/T THRMBO BIL MIDDL CEREB ARTER | Cerebrovascular Accident |
| ICD-10-CM | I63.50 | CI D/T UNSP OCLSN,UNSP CEREBRL ARTERY | Cerebrovascular Accident |
| ICD-10-CM | I63.543 | CI D/T UNSP OCCL/STEN BI CERBR ARTY | Cerebrovascular Accident |
| ICD-10-CM | I66.22 | OCCLS&STEN L POSTR CEREB ART | Cerebrovascular Accident |
| ICD-10-CM | R29.709 | NIHSS SCORE 9 | Cerebrovascular Accident |
| ICD-10-CM | I63.211 | CI D/T UNSP OCCL/STEN, R VERT ARTERY | Cerebrovascular Accident |
| ICD-10-CM | I63.311 | CEREB INFRC D/T THRMBO R MID CEREB ART | Cerebrovascular Accident |
| ICD-10-CM | I63.9 | CEREB INFRC UNSP | Cerebrovascular Accident |
| ICD-10-CM | I63.521 | CI D/T UNSP OCLSN R ANTER CRBRL ART | Cerebrovascular Accident |
| ICD-10-CM | R29.722 | NIHSS SCORE 22 | Cerebrovascular Accident |
| ICD-10-CM | I60.30 | NTSAH FR UNSP POSTERIOR COMM ARTERY | Cerebrovascular Accident |
| ICD-10-CM | I63.219 | CI D/T UNSP OCLSN/STN, UNSP VERT ARTR | Cerebrovascular Accident |
| ICD-10-CM | I63.431 | CEREB INFRC D/T EMBLSM R POSTR CEREB ART | Cerebrovascular Accident |
| ICD-10-CM | G43.601 | PERST MIG AURA W CI,NOT INTRCT,W STAT | Cerebrovascular Accident |
| ICD-10-CM | I60.01 | NTSAH FR CAROTID R SIPHN&BIFURCATN | Cerebrovascular Accident |
| ICD-10-CM | I60.11 | NONTRM SUBARC HEMRG FR R MID CEREB ART | Cerebrovascular Accident |
| ICD-10-CM | I63.449 | CEREB INFRC D/T EMBLSM UNSP CEREBEL ART | Cerebrovascular Accident |
| ICD-10-CM | R29.702 | NIHSS SCORE 2 | Cerebrovascular Accident |
| ICD-10-CM | R29.740 | NIHSS SCORE 40 | Cerebrovascular Accident |
| ICD-10-CM | I60.50 | NONTRM SUBARC HEMRG FR UNSP VERT ART | Cerebrovascular Accident |
| ICD-10-CM | R29.725 | NIHSS SCORE 25 | Cerebrovascular Accident |
| ICD-10-CM | I61.6 | NONTRM INTRCEREB HEMRG MULT LOC | Cerebrovascular Accident |
| ICD-10-CM | I63.341 | CEREB INFRC D/T THRMBO R CEREBEL ART | Cerebrovascular Accident |
| ICD-10-CM | I60.00 | NTSAH FR CAROTID UNSP SIPHN&BIFURCTN | Cerebrovascular Accident |
| ICD-10-CM | I61.1 | NONTRM INTRCEREB HEMRG IN HEMIS CORTICAL | Cerebrovascular Accident |
| ICD-10-CM | I63.533 | CI D/T UNSP OCCL/STEN BI POST CER ART | Cerebrovascular Accident |
| ICD-10-CM | R29.723 | NIHSS SCORE 23 | Cerebrovascular Accident |
| ICD-10-CM | I60.9 | NONTRM SUBARC HEMRG UNSP | Cerebrovascular Accident |
| ICD-10-CM | I63.039 | CEREB INFRC D/T THRMBO UNSP CRTD ART | Cerebrovascular Accident |
| ICD-10-CM | I63.413 | CI D/T EMBOL BIL MIDDL CEREBL ARTRY | Cerebrovascular Accident |
| ICD-10-CM | R29.715 | NIHSS SCORE 15 | Cerebrovascular Accident |
| ICD-10-CM | R29.738 | NIHSS SCORE 38 | Cerebrovascular Accident |
| ICD-10-CM | I61.5 | NONTRM INTRCEREB HEMRG INTRAVENTRICULAR | Cerebrovascular Accident |
| ICD-10-CM | I61.8 | OTH NONTRM INTRCEREB HEMRG | Cerebrovascular Accident |
| ICD-10-CM | I63.00 | CEREB INFRC D/T THRMBO UNSP PRECEREB ART | Cerebrovascular Accident |
| ICD-10-CM | I63.421 | CEREB INFRC D/T EMBLSM R ANT CEREB ART | Cerebrovascular Accident |
| ICD-10-CM | I63.59 | CI D/T UNSP OCLSN,OTH CEREBRAL ARTER | Cerebrovascular Accident |
| ICD-10-CM | I66.3 | OCCLS&STEN CEREBEL ART | Cerebrovascular Accident |
| ICD-10-CM | I63.6 | CI D/T CERBRL VENOUS THRMB,NONPYOGN | Cerebrovascular Accident |
| ICD-10-CM | I63.113 | CEREB INFRC D/T EMBLSM BILAT VERT ART | Cerebrovascular Accident |
| ICD-10-CM | I63.332 | CEREB INFRC D/T THRMBO L POSTR CEREB ART | Cerebrovascular Accident |
| ICD-10-CM | I63.439 | CI D/T EMBLSM UNSP POST CRBRL ARTR | Cerebrovascular Accident |
| ICD-10-CM | I63.519 | CI D/T UNSP OCLSN,UNSP MID CERBRL ART | Cerebrovascular Accident |
| ICD-10-CM | I66.29 | OCCLS&STEN UNSP POSTR CEREB ART | Cerebrovascular Accident |
| ICD-10-CM | I60.02 | NTSAH FR CAROTID L SIPHN&BIFURCATN | Cerebrovascular Accident |
| ICD-10-CM | I60.8 | OTH NONTRM SUBARC HEMRG | Cerebrovascular Accident |
| ICD-10-CM | R29.733 | NIHSS SCORE 33 | Cerebrovascular Accident |
| ICD-10-CM | G43.619 | PERST MIGR AURA W CI,INTRCT,WO ST MIG | Cerebrovascular Accident |
| ICD-10-CM | I60.6 | NONTRM SUBARC HEMRG FR OTH INTRCRN ART | Cerebrovascular Accident |
| ICD-10-CM | I63.239 | CI D/T UNSP OCLSN/STEN,UNSP CAR ARTER | Cerebrovascular Accident |
| ICD-10-CM | I66.11 | OCCLS&STEN R ANT CEREB ART | Cerebrovascular Accident |
| ICD-10-CM | I63.10 | CEREB INFRC D/T EMBLSM UNSP PRECEREB ART | Cerebrovascular Accident |
| ICD-10-CM | I63.231 | CI D/T UNSP OCLSN OF R CAROTID ARTE | Cerebrovascular Accident |
| ICD-10-CM | R29.717 | NIHSS SCORE 17 | Cerebrovascular Accident |
| ICD-10-CM | R29.731 | NIHSS SCORE 31 | Cerebrovascular Accident |
| ICD-10-CM | I60.12 | NONTRM SUBARC HEMRG FR L MID CEREB ART | Cerebrovascular Accident |
| ICD-10-CM | I63.013 | CEREB INFRC D/T THRMBO BILAT VERT ART | Cerebrovascular Accident |
| ICD-10-CM | I63.033 | CEREB INFRC D/T THRMBO BILAT CRTD ART | Cerebrovascular Accident |
| ICD-10-CM | I63.442 | CEREB INFRC D/T EMBLSM L CEREBEL ART | Cerebrovascular Accident |
| ICD-10-CM | I63.019 | CEREB INFRC D/T THRMBO UNSP VERT ART | Cerebrovascular Accident |
| ICD-10-CM | I63.429 | CI D/T EMBLSM OF UNSP ANT CRBRL ARTR | Cerebrovascular Accident |
| ICD-10-CM | I63.49 | CEREB INFRC D/T EMBLSM OTH CEREB ART | Cerebrovascular Accident |
| ICD-10-CM | I63.542 | CI D/T UNSP OCLSN L CEREBELLR ARTRY | Cerebrovascular Accident |
| ICD-10-CM | R29.742 | NIHSS SCORE 42 | Cerebrovascular Accident |
| ICD-10-CM | I63.031 | CEREB INFRC D/T THRMBO R CRTD ART | Cerebrovascular Accident |
| ICD-10-CM | I63.339 | CI D/T THRMB OF UNSP POST CRBRL ARTR | Cerebrovascular Accident |
| ICD-10-CM | I63.432 | CEREB INFRC D/T EMBLSM L POSTR CEREB ART | Cerebrovascular Accident |
| ICD-10-CM | R29.727 | NIHSS SCORE 27 | Cerebrovascular Accident |
| ICD-10-CM | I60.31 | NTSAH FR R POSTERIOR COMMUN ARTERY | Cerebrovascular Accident |
| ICD-10-CM | I62.01 | NONTRM AC SUBDR HEMRG | Cerebrovascular Accident |
| ICD-10-CM | R29.701 | NIHSS SCORE 1 | Cerebrovascular Accident |
| ICD-10-CM | R29.713 | NIHSS SCORE 13 | Cerebrovascular Accident |
| ICD-10-CM | R29.721 | NIHSS SCORE 21 | Cerebrovascular Accident |
| ICD-10-CM | I60.51 | NONTRM SUBARC HEMRG FR R VERT ART | Cerebrovascular Accident |
| ICD-10-CM | I63.40 | CEREB INFRC D/T EMBLSM UNSP CEREB ART | Cerebrovascular Accident |
| ICD-10-CM | I63.549 | CI D/T UNSP OCLSN,UNSP CEREBELLR ARTE | Cerebrovascular Accident |
| ICD-10-CM | I62.02 | NONTRM SUBAC SUBDR HEMRG | Cerebrovascular Accident |
| ICD-10-CM | I63.012 | CEREB INFRC D/T THRMBO L VERT ART | Cerebrovascular Accident |
| ICD-10-CM | I63.20 | CI D/T UNSP OCLSN,UNSP PRCRBRL ARTERI | Cerebrovascular Accident |
| ICD-10-CM | I63.511 | CI D/T UNSP OCLSN, R CEREBRL ARTERY | Cerebrovascular Accident |
| ICD-10-CM | I63.531 | CI D/T UNSP OCLSN R POSTE CRBRL ART | Cerebrovascular Accident |
| ICD-10-CM | I63.532 | CI D/T UNSP OCLSN L POST CERBRL ART | Cerebrovascular Accident |
| ICD-10-CM | I66.12 | OCCLS&STEN L ANT CEREB ART | Cerebrovascular Accident |
| ICD-10-CM | R29.719 | NIHSS SCORE 19 | Cerebrovascular Accident |
| ICD-10-CM | R29.724 | NIHSS SCORE 24 | Cerebrovascular Accident |
| ICD-10-CM | R29.729 | NIHSS SCORE 29 | Cerebrovascular Accident |
| ICD-10-CM | I63.111 | CEREB INFRC D/T EMBLSM R VERT ART | Cerebrovascular Accident |
| ICD-10-CM | I63.411 | CEREB INFRC D/T EMBLSM R MID CEREB ART | Cerebrovascular Accident |
| ICD-10-CM | I63.412 | CEREB INFRC D/T EMBLSM L MID CEREB ART | Cerebrovascular Accident |
| ICD-10-CM | R29.734 | NIHSS SCORE 34 | Cerebrovascular Accident |
| ICD-10-CM | R29.736 | NIHSS SCORE 36 | Cerebrovascular Accident |
| ICD-10-CM | I63.119 | CEREB INFRC D/T EMBLSM UNSP VERT ART | Cerebrovascular Accident |
| ICD-10-CM | I62.00 | NONTRM SUBDR HEMRG UNSP | Cerebrovascular Accident |
| ICD-10-CM | I63.213 | CI D/T UNSP OCL/STEN BI VERTB ARTERY | Cerebrovascular Accident |
| ICD-10-CM | I63.349 | CEREB INFRC D/T THRMBO UNSP CEREBEL ART | Cerebrovascular Accident |
| ICD-10-CM | R29.706 | NIHSS SCORE 6 | Cerebrovascular Accident |
| ICD-10-CM | R29.708 | NIHSS SCORE 8 | Cerebrovascular Accident |
| ICD-10-CM | R29.730 | NIHSS SCORE 30 | Cerebrovascular Accident |
| ICD-10-CM | I66.9 | OCCLS&STEN UNSP CEREB ART | Cerebrovascular Accident |
| ICD-10-CM | R29.705 | NIHSS SCORE 5 | Cerebrovascular Accident |
| ICD-10-CM | R29.711 | NIHSS SCORE 11 | Cerebrovascular Accident |
| ICD-10-CM | R29.718 | NIHSS SCORE 18 | Cerebrovascular Accident |
| ICD-10-CM | R29.737 | NIHSS SCORE 37 | Cerebrovascular Accident |
| ICD-10-CM | I61.3 | NONTRM INTRCEREB HEMRG IN BRN STEM | Cerebrovascular Accident |
| ICD-10-CM | I62.03 | NONTRM CHR SUBDR HEMRG | Cerebrovascular Accident |
| ICD-10-CM | I63.132 | CEREB INFRC D/T EMBLSM L CRTD ART | Cerebrovascular Accident |
| ICD-10-CM | I63.513 | CI D/T UNSP OCL/STEN BIL MID CER ART | Cerebrovascular Accident |
| ICD-10-CM | R29.716 | NIHSS SCORE 16 | Cerebrovascular Accident |
| ICD-10-CM | I63.133 | CEREB INFRC D/T EMBLSM BILAT CRTD ART | Cerebrovascular Accident |
| ICD-10-CM | I63.423 | CI D/T EMBOL BIL ANTER CEREBL ARTRY | Cerebrovascular Accident |
| ICD-10-CM | I63.529 | CI D/T UNSP OCLSN,UNSP ANTE CRBRL ART | Cerebrovascular Accident |
| ICD-10-CM | I66.09 | OCCLS&STEN UNSP MID CEREB ART | Cerebrovascular Accident |
| ICD-10-CM | R29.710 | NIHSS SCORE 10 | Cerebrovascular Accident |
| ICD-10-CM | I63.139 | CEREB INFRC D/T EMBLSM UNSP CRTD ART | Cerebrovascular Accident |
| ICD-10-CM | I63.312 | CEREB INFRC D/T THRMBO L MID CEREB ART | Cerebrovascular Accident |
| ICD-10-CM | I63.319 | CI D/T THRMB OF UNSP MID CERBR ARTRY | Cerebrovascular Accident |
| ICD-10-CM | I63.441 | CEREB INFRC D/T EMBLSM R CEREBEL ART | Cerebrovascular Accident |
| ICD-10-CM | R29.741 | NIHSS SCORE 41 | Cerebrovascular Accident |
| ICD-10-CM | I61.2 | NONTRM INTRCEREB HEMRG IN HEMIS UNSP | Cerebrovascular Accident |
| ICD-10-CM | I63.323 | CI D/T THRMBO BIL ANTER CEREB ART | Cerebrovascular Accident |
| ICD-10-CM | I63.342 | CEREB INFRC D/T THRMBO L CEREBEL ART | Cerebrovascular Accident |
| ICD-10-CM | I63.422 | CEREB INFRC D/T EMBLSM L ANT CEREB ART | Cerebrovascular Accident |
| ICD-10-CM | I63.232 | CI D/T UNSP OCLSN OF L CAROTID ARTE | Cerebrovascular Accident |
| ICD-10-CM | I63.30 | CEREB INFRC D/T THRMBO UNSP CEREB ART | Cerebrovascular Accident |
| ICD-10-CM | R29.714 | NIHSS SCORE 14 | Cerebrovascular Accident |
| ICD-10-CM | I61.4 | NONTRM INTRCEREB HEMRG IN CERBEL | Cerebrovascular Accident |
| ICD-10-CM | I63.333 | CI D/T THRMBO BIL POST CEREB ARTERY | Cerebrovascular Accident |
| ICD-10-CM | I63.011 | CEREB INFRC D/T THRMBO R VERT ART | Cerebrovascular Accident |
| ICD-10-CM | I63.112 | CEREB INFRC D/T EMBLSM L VERT ART | Cerebrovascular Accident |
| ICD-10-CM | I63.22 | CI D/T UNSP OCCL/STEN BASILAR ARTERY | Cerebrovascular Accident |
| ICD-10-CM | I63.541 | CI D/T UNSP OCLSN R CEREBELLR ARTRY | Cerebrovascular Accident |
| ICD-10-CM | R29.700 | NIHSS SCORE 0 | Cerebrovascular Accident |
| ICD-10-CM | I63.512 | CI D/T UNSP OCLSN, L CEREBRL ARTERY | Cerebrovascular Accident |
| ICD-10-CM | R29.726 | NIHSS SCORE 26 | Cerebrovascular Accident |
| ICD-10-CM | I66.23 | OCCLS&STEN BILAT POSTR CEREB ART | Cerebrovascular Accident |
| ICD-10-CM | R29.732 | NIHSS SCORE 32 | Cerebrovascular Accident |
| ICD-10-CM | I63.131 | CEREB INFRC D/T EMBLSM R CRTD ART | Cerebrovascular Accident |
| ICD-10-CM | I66.01 | OCCLS&STEN R MID CEREB ART | Cerebrovascular Accident |
| ICD-10-CM | I66.8 | OCCLS&STEN OTH CEREB ART | Cerebrovascular Accident |
| ICD-10-CM | G43.611 | PERST MIGRN AURA W CI,INTRCT,W ST MIG | Cerebrovascular Accident |
| ICD-10-CM | I63.419 | CI D/T EMBLSM OF UNSP MID CRBRL ARTR | Cerebrovascular Accident |
| ICD-10-CM | I63.433 | CI D/T EMBOL BI POSTER CEREBRL ARTY | Cerebrovascular Accident |
| ICD-10-CM | I63.443 | CEREB INFRC D/T EMBLSM BILAT CEREBEL ART | Cerebrovascular Accident |
| ICD-10-CM | R29.735 | NIHSS SCORE 35 | Cerebrovascular Accident |
| ICD-10-CM | I62.9 | NONTRM INTRCRN HEMRG UNSP | Cerebrovascular Accident |
| ICD-10-CM | I63.29 | CI D/T UNSP OCLSN,OTH PRECERBRL ARTR | Cerebrovascular Accident |
| ICD-10-CM | I63.8 | OTH CEREBRAL INFARCTION | Cerebrovascular Accident |
| ICD-10-CM | R29.704 | NIHSS SCORE 4 | Cerebrovascular Accident |
| ICD-10-CM | I60.4 | NONTRM SUBARC HEMRG FR BASILAR ART | Cerebrovascular Accident |
| ICD-10-CM | I61.9 | NONTRM INTRCEREB HEMRG UNSP | Cerebrovascular Accident |
| ICD-10-CM | I63.539 | CI D/T UNSP OCLSN UNSP POST CRBRL ART | Cerebrovascular Accident |
| ICD-10-CM | I66.03 | OCCLS&STEN BILAT MID CEREB ART | Cerebrovascular Accident |
| ICD-10-CM | I63.032 | CEREB INFRC D/T THRMBO L CRTD ART | Cerebrovascular Accident |
| ICD-10-CM | I63.19 | CEREB INFRC D/T EMBLSM OTH PRECEREB ART | Cerebrovascular Accident |
| ICD-10-CM | I63.331 | CEREB INFRC D/T THRMBO R POSTR CEREB ART | Cerebrovascular Accident |
| ICD-10-CM | I63.343 | CEREB INFRC D/T THRMBO BILAT CEREBEL ART | Cerebrovascular Accident |
| ICD-10-CM | I66.02 | OCCLS&STEN L MID CEREB ART | Cerebrovascular Accident |
| ICD-10-CM | R29.712 | NIHSS SCORE 12 | Cerebrovascular Accident |
| ICD-10-CM | I62.1 | NONTRM EXTRADURAL HEMRG | Cerebrovascular Accident |
| ICD-10-CM | R29.739 | NIHSS SCORE 39 | Cerebrovascular Accident |
| ICD-10-CM | I63.523 | CI D/T UNSP OCL/STEN BIL ANT CER ART | Cerebrovascular Accident |
| ICD-10-CM | T81.30XA | DISRUPT WOUND UNSP INIT | Dehiscence |
| ICD-10-CM | T81.32XS | DISRUPT INTER OP (SURG) WOUND NEC SEQ | Dehiscence |
| ICD-10-CM | T81.30XS | DISRUPT WOUND UNSP SEQ | Dehiscence |
| ICD-10-CM | T81.31XD | DISRUPT EXT OP (SURG) WOUND NEC SUBSQ | Dehiscence |
| ICD-10-CM | T81.31XA | DISRUPT EXT OP (SURG) WOUND NEC INIT | Dehiscence |
| ICD-10-CM | T81.32XA | DISRUPT INTER OP (SURG) WOUND NEC INIT | Dehiscence |
| ICD-10-CM | T81.31XS | DISRUPT EXT OP (SURG) WOUND NEC SEQ | Dehiscence |
| ICD-10-CM | T81.30XD | DISRUPT WOUND UNSP SUBSQ | Dehiscence |
| ICD-10-CM | T81.32XD | DISRUPT INTER OP (SURG) WOUND NEC SUBSQ | Dehiscence |
| ICD-10-CM | I21.02 | STEMI INVLNG L ANT DESCDNG COR ART | Myocardial Infarction |
| ICD-10-CM | I21.09 | STEMI INVLNG OTH COR ARTY ANTE WALL | Myocardial Infarction |
| ICD-10-CM | I21.A1 | MYCARD INFRC TYPE 2 | Myocardial Infarction |
| ICD-10-CM | I21.01 | STEMI INVLVNG L MAIN CORONRY ARTRY | Myocardial Infarction |
| ICD-10-CM | I21 | STEMI&NSTEMI | Myocardial Infarction |
| ICD-10-CM | I22.2 | SUBSQ NSTEMI | Myocardial Infarction |
| ICD-10-CM | I22.1 | SUBSQ STEMI OF INFERIOR WALL | Myocardial Infarction |
| ICD-10-CM | I22.0 | SUBSQ STEMI OF ANTERIOR WALL | Myocardial Infarction |
| ICD-10-CM | I21.4 | NON-ST ELEV (NSTEMI) MYCARD INFRC | Myocardial Infarction |
| ICD-10-CM | I21.0 | STEMI OF ANTERIOR WALL | Myocardial Infarction |
| ICD-10-CM | I22 | SUBSQ STEMI AND NSTEMI | Myocardial Infarction |
| ICD-10-CM | I21.2 | STEMI OF OTH SITES | Myocardial Infarction |
| ICD-10-CM | I21.29 | STEMI INVOLVING OTH SITES | Myocardial Infarction |
| ICD-10-CM | I21.9 | AC MYCARD INFRC UNSP | Myocardial Infarction |
| ICD-10-CM | I21.11 | STEMI INVOLVING R CORONARY ARTERY | Myocardial Infarction |
| ICD-10-CM | I21.A9 | OTH MYCARD INFRC TYPE | Myocardial Infarction |
| ICD-10-CM | I21.1 | STEMI OF INFERIOR WALL | Myocardial Infarction |
| ICD-10-CM | I21.21 | STEMI INVLVNG L CIRCUM CORON ARTRY | Myocardial Infarction |
| ICD-10-CM | I21.3 | STEMI OF UNSP SITE | Myocardial Infarction |
| ICD-10-CM | I25.2 | OLD MYCARD INFRC | Myocardial Infarction |
| ICD-10-CM | I21.19 | STEMI INVLNG OTH COR ARTY INFE WALL | Myocardial Infarction |
| ICD-10-CM | I22.9 | SUBSQ STEMI OF UNSP SITE | Myocardial Infarction |
| ICD-10-CM | I24.1 | DRESSLER'S SYND | Myocardial Infarction |
| ICD-10-CM | I22.8 | SUBSQ STEMI OF OTH SITES | Myocardial Infarction |
| ICD-10-CM | J12.89 | OTH VIRAL PN | Pneumonia |
| ICD-10-CM | J18.9 | PN UNSP ORGISM | Pneumonia |
| ICD-10-CM | J15.9 | UNSP BACTERIAL PN | Pneumonia |
| ICD-10-CM | J12.9 | VIRAL PN UNSP | Pneumonia |
| ICD-10-CM | J12.3 | HUMAN METAPNEUMOVIRUS PN | Pneumonia |
| ICD-10-CM | J12.1 | RESP SYNCYTIAL VIRUS PN | Pneumonia |
| ICD-10-CM | J16.8 | PN D/T OTH SPEC INFCT ORGISMS | Pneumonia |
| ICD-10-CM | J18.1 | LOBAR PN UNSP ORGISM | Pneumonia |
| ICD-10-CM | J18.2 | HYPOSTATIC PN UNSP ORGISM | Pneumonia |
| ICD-10-CM | J16.0 | CHLAMYIAL PN | Pneumonia |
| ICD-10-CM | J12.0 | ADENOVIRAL PN | Pneumonia |
| ICD-10-CM | J95.89 | OTH POSTP COMP&DISORD RESP SYS NEC | Pneumonia |
| ICD-10-CM | J18.8 | OTH PN UNSP ORGISM | Pneumonia |
| ICD-10-CM | J18.0 | BRONCHOPN UNSP ORGISM | Pneumonia |
| ICD-10-CM | J12.2 | PARAINFLUENZA VIRUS PN | Pneumonia |
| ICD-10-CM | T81.12XA | POSTP SEPTIC SHOCK INIT | Postprocedural Septic Shock |
| ICD-10-CM | T81.12XD | POSTP SEPTIC SHOCK SUBSQ | Postprocedural Septic Shock |
| ICD-10-CM | T81.12XS | POSTP SEPTIC SHOCK SEQ | Postprocedural Septic Shock |
| ICD-10-CM | T81.44XA | SEPSIS FOL A PROC INIT | SSI/Sepsis |
| ICD-10-CM | T81.4XXD | INFCT FOLLOWING A PROCURE,SUBSQ | SSI/Sepsis |
| ICD-10-CM | T81.40XS | INFCT FOL A PROC UNSP SEQ | SSI/Sepsis |
| ICD-10-CM | T81.4X | INFCT FOLLOWING A PROCURE | SSI/Sepsis |
| ICD-10-CM | T81.41XS | INFCT FOLL PRO, INCISL SURG SITE,SEQ | SSI/Sepsis |
| ICD-10-CM | T81.49XA | INFCT FOL A PROC OTH SURG SIT INIT | SSI/Sepsis |
| ICD-10-CM | T81.41XD | INFCT FOLL PRO, INCISL SURG SITE,SUBSQ | SSI/Sepsis |
| ICD-10-CM | T81.43XA | INFCT FOL A PROC ORG&SPC SURG SIT INIT | SSI/Sepsis |
| ICD-10-CM | T81.44XD | SEPSIS FOL A PROC SUBSQ | SSI/Sepsis |
| ICD-10-CM | T81.41XA | INFCT FOLL PRO, INCISL SURG SITE,INIT | SSI/Sepsis |
| ICD-10-CM | T81.4XXA | INFCT FOLLOWING A PROCURE,INIT | SSI/Sepsis |
| ICD-10-CM | T81.4XX | INFCT FOLLOWING A PROCURE | SSI/Sepsis |
| ICD-10-CM | T81.42XA | INF FOLL PROC,DEEP INC SURG SITE,INIT | SSI/Sepsis |
| ICD-10-CM | T81.43XS | INFCT FOL A PROC ORG&SPC SURG SIT SEQ | SSI/Sepsis |
| ICD-10-CM | T81.4XXS | INFCT FOLLOWING A PROCURE,SEQ | SSI/Sepsis |
| ICD-10-CM | T81.49XD | INFCT FOL A PROC OTH SURG SIT SUBSQ | SSI/Sepsis |
| ICD-10-CM | T81.40XD | INFCT FOL A PROC UNSP SUBSQ | SSI/Sepsis |
| ICD-10-CM | T81.44XS | SEPSIS FOL A PROC SEQ | SSI/Sepsis |
| ICD-10-CM | T81.42XS | INF FOLL PROC,DEEP INC SURG SITE,SEQ | SSI/Sepsis |
| ICD-10-CM | T81.43XD | INF FOLL PRO,ORGN/SPCE SURG SITE,SUBSQ | SSI/Sepsis |
| ICD-10-CM | T81.42XD | INF FOLL PROC,DEEP INC SURG SITE,SUBSQ | SSI/Sepsis |
| ICD-10-CM | T81.40XA | INFCT FOL A PROC UNSP INIT | SSI/Sepsis |
| ICD-10-CM | T81.49XS | INFCT FOL A PROC OTH SURG SIT SEQ | SSI/Sepsis |
| ICD-10-CM | R65.20 | SEV SEPSIS WO SEPTIC SHOCK | Severe Sepsis |
| ICD-10-CM | R65.21 | SEV SEPSIS W SEPTIC SHOCK | Severe Sepsis |
| ICD-10-CM | R99 | ILL-DEFINED&UNKNOWN CAUSE MORTALITY | Sudden Death |
| ICD-10-CM | N39.0 | URIN TRCT INFCT SIT NOT SPEC | Urinary Tract Infection |
| ICD-10-CM | I82.439 | AC EMBLSM&THRMBO UNSP POPL VN | Venous Thromboembolism |
| ICD-10-CM | I82.5Z1 | CHRNC THRMBO UNSP DEEP VN R DIST LO | Venous Thromboembolism |
| ICD-10-CM | I26.02 | SADDL EMBLS PULM ART W AC COR PUL | Venous Thromboembolism |
| ICD-10-CM | I82.413 | AC EMBLSM&THRMBO FEMR VN BILAT | Venous Thromboembolism |
| ICD-10-CM | I82.602 | AC EMBLSM&THRMBO UNSP VN L UP EXTRM | Venous Thromboembolism |
| ICD-10-CM | I82.609 | AC EMBLSM&THRMBO UNSP VN UNSP UP EXTRM | Venous Thromboembolism |
| ICD-10-CM | I82.612 | AC EMBLSM&THRMBO SUPRF VN L UP EXTRM | Venous Thromboembolism |
| ICD-10-CM | I82.411 | AC EMBLSM&THRMBO R FEMR VN | Venous Thromboembolism |
| ICD-10-CM | I82.553 | CHR EMBLSM&THRMBO PERON VN BILAT | Venous Thromboembolism |
| ICD-10-CM | I82.B19 | AC EMBLSM&THRMBO UNSP SUBCLAV VN | Venous Thromboembolism |
| ICD-10-CM | I80.8 | PHLBTS&THRPHLBTS OTH SIT | Venous Thromboembolism |
| ICD-10-CM | I82.449 | AC EMBLSM&THRMBO UNSP TIB VN | Venous Thromboembolism |
| ICD-10-CM | I80.211 | PHLBTS&THRPHLBTS R ILAC VN | Venous Thromboembolism |
| ICD-10-CM | I82.401 | AC EMBL&THRMBO UNSP DEEP VN R LO EXTRM | Venous Thromboembolism |
| ICD-10-CM | I82.503 | CHRN THRMBO UNSP DEEP VNS LO EXT,BI | Venous Thromboembolism |
| ICD-10-CM | I82.551 | CHR EMBLSM&THRMBO R PERON VN | Venous Thromboembolism |
| ICD-10-CM | I82.812 | EMBLSM&THRMBO SUPRF VN L LO EXTRM | Venous Thromboembolism |
| ICD-10-CM | I82.91 | CHR EMBLSM&THRMBO UNSP VN | Venous Thromboembolism |
| ICD-10-CM | I82.433 | AC EMBLSM&THRMBO POPL VN BILAT | Venous Thromboembolism |
| ICD-10-CM | I82.4Z1 | AC THRMB UNSP DEEP VN R DISTL LO | Venous Thromboembolism |
| ICD-10-CM | I82.523 | CHR EMBLSM&THRMBO ILAC VN BILAT | Venous Thromboembolism |
| ICD-10-CM | I82.90 | AC EMBLSM&THRMBO UNSP VN | Venous Thromboembolism |
| ICD-10-CM | I82.A22 | CHR EMBLSM&THRMBO L AXLY VN | Venous Thromboembolism |
| ICD-10-CM | I26.94 | MULT SUBSEG THROM PULM EMB /O AC CORPULM | Venous Thromboembolism |
| ICD-10-CM | I80.242 | PHLBTS&THRPHLBTS L PERON VN | Venous Thromboembolism |
| ICD-10-CM | I82.B22 | CHR EMBLSM&THRMBO L SUBCLAV VN | Venous Thromboembolism |
| ICD-10-CM | I82.599 | CHRNC THRMB OTH SP DEEP VN UNSP LO | Venous Thromboembolism |
| ICD-10-CM | I82.5Y2 | CHRNC THRMBO UNSP DEEP VN L PRXM LO | Venous Thromboembolism |
| ICD-10-CM | I80.223 | PHLBTS&THRPHLBTS POPL VN BILAT | Venous Thromboembolism |
| ICD-10-CM | I82.A29 | CHR EMBLSM&THRMBO UNSP AXLY VN | Venous Thromboembolism |
| ICD-10-CM | I82.549 | CHR EMBLSM&THRMBO UNSP TIB VN | Venous Thromboembolism |
| ICD-10-CM | I82.A23 | CHR EMBLSM&THRMBO AXLY VN BILAT | Venous Thromboembolism |
| ICD-10-CM | I80.203 | PHLEBITS,UNSP DEEP VSL,LWR EXTRM,BIL | Venous Thromboembolism |
| ICD-10-CM | I80.221 | PHLBTS&THRPHLBTS R POPL VN | Venous Thromboembolism |
| ICD-10-CM | I82.422 | AC EMBLSM&THRMBO L ILAC VN | Venous Thromboembolism |
| ICD-10-CM | I82.443 | AC EMBLSM&THRMBO TIB VN BILAT | Venous Thromboembolism |
| ICD-10-CM | I82.629 | AC EMBLSM&THRMBO DP VN UNSP UP EXTRM | Venous Thromboembolism |
| ICD-10-CM | I82.819 | EMBLSM&THRMBO SUPRF VN UNSP LO EXTRM | Venous Thromboembolism |
| ICD-10-CM | I26.90 | SEPTIC PULM EMBLSM WO AC COR PULMONALE | Venous Thromboembolism |
| ICD-10-CM | I82.532 | CHR EMBLSM&THRMBO L POPL VN | Venous Thromboembolism |
| ICD-10-CM | I82.702 | CHR EMBLSM&THRMBO UNSP VN L UP EXTRM | Venous Thromboembolism |
| ICD-10-CM | I82.719 | CHRNC THRMBOO,SPRFCL VN,UNSP UPR EXT | Venous Thromboembolism |
| ICD-10-CM | I82.B12 | AC EMBLSM&THRMBO L SUBCLAV VN | Venous Thromboembolism |
| ICD-10-CM | I82.B21 | CHR EMBLSM&THRMBO R SUBCLAV VN | Venous Thromboembolism |
| ICD-10-CM | I82.463 | AC EMBOL/THRMBO,CALF,MUS VEIN BIL | Venous Thromboembolism |
| ICD-10-CM | I80.201 | PHLEBITIS,UNSP DEEP VSL R LO EXTRM | Venous Thromboembolism |
| ICD-10-CM | I80.231 | PHLBTS&THRPHLBTS R TIB VN | Venous Thromboembolism |
| ICD-10-CM | I82.221 | CHR EMBLSM&THRMBO IVC | Venous Thromboembolism |
| ICD-10-CM | I82.C21 | CHR EMBLSM&THRMBO R INTER JUG VN | Venous Thromboembolism |
| ICD-10-CM | I80.03 | PHLEBITIS,SUPRFCL VESSL,LWR EXT,BIL | Venous Thromboembolism |
| ICD-10-CM | I80.213 | PHLBTS&THRPHLBTS ILAC VN BILAT | Venous Thromboembolism |
| ICD-10-CM | I82.220 | AC EMBLSM&THRMBO IVC | Venous Thromboembolism |
| ICD-10-CM | I82.491 | AC THRMB OTH SPEC DEEP VN R LO EX | Venous Thromboembolism |
| ICD-10-CM | I82.A12 | AC EMBLSM&THRMBO L AXLY VN | Venous Thromboembolism |
| ICD-10-CM | I80.222 | PHLBTS&THRPHLBTS L POPL VN | Venous Thromboembolism |
| ICD-10-CM | I80.243 | PHLBTS&THRPHLBTS PERON VN BILAT | Venous Thromboembolism |
| ICD-10-CM | I82.4Z9 | AC THRMB UNSP DEEP VN UNSP DSTL LO | Venous Thromboembolism |
| ICD-10-CM | I82.561 | CHR EMBLSM&THRMBO R CALF MUSCULAR VN | Venous Thromboembolism |
| ICD-10-CM | I82.5Z3 | CHRNC THRMB UNSP DEEP VN DIST LO,BIL | Venous Thromboembolism |
| ICD-10-CM | I82.713 | CHRNC THRMBOO,SPRFCL VN,UPR EXT,BIL | Venous Thromboembolism |
| ICD-10-CM | I82.A13 | AC EMBLSM&THRMBO AXLY VN BILAT | Venous Thromboembolism |
| ICD-10-CM | I80.13 | PHLBTS&THRPHLBTS FEMR VN BILAT | Venous Thromboembolism |
| ICD-10-CM | I82.462 | AC EMBLSM&THRMBO L CALF MUSCULAR VN | Venous Thromboembolism |
| ICD-10-CM | I82.4Y9 | AC THRMB UNSP DEEP VN UNSP PRXM LO | Venous Thromboembolism |
| ICD-10-CM | I82.619 | ACUTE THRMBOO,SPRFCL VN,UNSP UPR EXT | Venous Thromboembolism |
| ICD-10-CM | I82.611 | AC EMBLSM&THRMBO SUPRF VN R UP EXTRM | Venous Thromboembolism |
| ICD-10-CM | I82.722 | CHR EMBLSM&THRMBO DP VN L UP EXTRM | Venous Thromboembolism |
| ICD-10-CM | I82.C13 | AC EMBLSM&THRMBO INTER JUG VN BILAT | Venous Thromboembolism |
| ICD-10-CM | I26.93 | SNG SUBSEG THROM PULM EMBO /O AC CORPULM | Venous Thromboembolism |
| ICD-10-CM | I80.249 | PHLBTS&THRPHLBTS UNSP PERON VN | Venous Thromboembolism |
| ICD-10-CM | I82.452 | AC EMBLSM&THRMBO L PERON VN | Venous Thromboembolism |
| ICD-10-CM | I82.513 | CHR EMBLSM&THRMBO FEMR VN BILAT | Venous Thromboembolism |
| ICD-10-CM | I82.522 | CHR EMBLSM&THRMBO L ILAC VN | Venous Thromboembolism |
| ICD-10-CM | I82.B23 | CHR EMBLSM&THRMBO SUBCLAV VN BILAT | Venous Thromboembolism |
| ICD-10-CM | I82.409 | AC EMBL&THRMBO UNSP DP VN UNSP LO EXTRM | Venous Thromboembolism |
| ICD-10-CM | I82.412 | AC EMBLSM&THRMBO L FEMR VN | Venous Thromboembolism |
| ICD-10-CM | I82.542 | CHR EMBLSM&THRMBO L TIB VN | Venous Thromboembolism |
| ICD-10-CM | I80.01 | PHLEBITIS,SUPRFCL VSSLS R LO EXT | Venous Thromboembolism |
| ICD-10-CM | I81 | PORT VN THRMBO | Venous Thromboembolism |
| ICD-10-CM | I82.210 | AC EMBLSM&THRMBO SVC | Venous Thromboembolism |
| ICD-10-CM | I82.4Y2 | AC THRMB UNSP DEEP VN L PRXML LO | Venous Thromboembolism |
| ICD-10-CM | I82.559 | CHR EMBLSM&THRMBO UNSP PERON VN | Venous Thromboembolism |
| ICD-10-CM | I82.709 | CHRNC THRMBOOSI,UNSP VNS,UNSP UPR EXT | Venous Thromboembolism |
| ICD-10-CM | I80.209 | PHLEBITS,UNSP DEEP VSL,UNSP LO EXTRM | Venous Thromboembolism |
| ICD-10-CM | I80.229 | PHLBTS&THRPHLBTS UNSP POPL VN | Venous Thromboembolism |
| ICD-10-CM | I82.891 | CHR EMBLSM&THRMBO OTH SPEC VN | Venous Thromboembolism |
| ICD-10-CM | I26.01 | SEPTIC PULM EMBLSM W AC COR PULMONALE | Venous Thromboembolism |
| ICD-10-CM | I80.00 | PHLEBITIS SPRFCL VSSLS UNSP LO EXT | Venous Thromboembolism |
| ICD-10-CM | I82.290 | AC EMBLSM&THRMBO OTH THOR VN | Venous Thromboembolism |
| ICD-10-CM | I82.291 | CHR EMBLSM&THRMBO OTH THOR VN | Venous Thromboembolism |
| ICD-10-CM | I82.421 | AC EMBLSM&THRMBO R ILAC VN | Venous Thromboembolism |
| ICD-10-CM | I82.509 | CHRN THRMBO UNSP DEEP VNS UNSP LO EXT | Venous Thromboembolism |
| ICD-10-CM | I82.521 | CHR EMBLSM&THRMBO R ILAC VN | Venous Thromboembolism |
| ICD-10-CM | I82.539 | CHR EMBLSM&THRMBO UNSP POPL VN | Venous Thromboembolism |
| ICD-10-CM | I82.613 | ACUTE THRMBOO,SPRFCL VN,UPR EXT,BIL | Venous Thromboembolism |
| ICD-10-CM | I82.493 | AC THRMB OTH SPEC DEEP VN LO, BILAT | Venous Thromboembolism |
| ICD-10-CM | I82.451 | AC EMBLSM&THRMBO R PERON VN | Venous Thromboembolism |
| ICD-10-CM | I82.469 | AC EMBLSM&THRMBO UNSP CALF MUSCULAR VN | Venous Thromboembolism |
| ICD-10-CM | I80.02 | PHLEBITIS,SUPRFCL VSSLS L LO EXT | Venous Thromboembolism |
| ICD-10-CM | I82.569 | CHRON EMBOL/THROM UNSP CALF MUSC VEIN | Venous Thromboembolism |
| ICD-10-CM | I27.82 | CHR PULM EMBLSM | Venous Thromboembolism |
| ICD-10-CM | I80.212 | PHLBTS&THRPHLBTS L ILAC VN | Venous Thromboembolism |
| ICD-10-CM | I80.292 | PHLEBITIS,OTH DEEP VSL L LO EXTRM | Venous Thromboembolism |
| ICD-10-CM | I82.419 | AC EMBLSM&THRMBO UNSP FEMR VN | Venous Thromboembolism |
| ICD-10-CM | I82.441 | AC EMBLSM&THRMBO R TIB VN | Venous Thromboembolism |
| ICD-10-CM | I82.A21 | CHR EMBLSM&THRMBO R AXLY VN | Venous Thromboembolism |
| ICD-10-CM | I80.239 | PHLBTS&THRPHLBTS UNSP TIB VN | Venous Thromboembolism |
| ICD-10-CM | I82.541 | CHR EMBLSM&THRMBO R TIB VN | Venous Thromboembolism |
| ICD-10-CM | I82.5Z2 | CHRNC THRMBO UNSP DEEP VN L DIST LO | Venous Thromboembolism |
| ICD-10-CM | I80.291 | PHLEBITIS,OTH DEEP VSL R LO EXTRM | Venous Thromboembolism |
| ICD-10-CM | I82.4Z2 | AC THRMB UNSP DEEP VN L DISTL LO | Venous Thromboembolism |
| ICD-10-CM | I80.12 | PHLBTS&THRPHLBTS L FEMR VN | Venous Thromboembolism |
| ICD-10-CM | I80.253 | PHLEBT THRMBOPHLB,CALF,MUS VEIN BIL | Venous Thromboembolism |
| ICD-10-CM | I80.219 | PHLBTS&THRPHLBTS UNSP ILAC VN | Venous Thromboembolism |
| ICD-10-CM | I82.0 | BUDD-CHIARI SYND | Venous Thromboembolism |
| ICD-10-CM | I82.519 | CHR EMBLSM&THRMBO UNSP FEMR VN | Venous Thromboembolism |
| ICD-10-CM | I82.703 | CHRNC THRMBOOSI,UNSP VNS,UPR EXT,BIL | Venous Thromboembolism |
| ICD-10-CM | I82.721 | CHR EMBLSM&THRMBO DP VN R UP EXTRM | Venous Thromboembolism |
| ICD-10-CM | I82.729 | CHR EMBLSM&THRMBO DP VN UNSP UP EXTRM | Venous Thromboembolism |
| ICD-10-CM | I82.A11 | AC EMBLSM&THRMBO R AXLY VN | Venous Thromboembolism |
| ICD-10-CM | I82.459 | AC EMBLSM&THRMBO UNSP PERON VN | Venous Thromboembolism |
| ICD-10-CM | I82.501 | CHRN THRMBO UNSP DEEP VNS R LO EXT | Venous Thromboembolism |
| ICD-10-CM | I82.512 | CHR EMBLSM&THRMBO L FEMR VN | Venous Thromboembolism |
| ICD-10-CM | I82.5Z9 | CHRNC THRMB UNSP DEEP VN UNSP DIST LO | Venous Thromboembolism |
| ICD-10-CM | I82.623 | AC EMBLSM&THRMBO DP VN UP EXTRM BILAT | Venous Thromboembolism |
| ICD-10-CM | I82.813 | EMBLSM&THRMBO SUPRF VN LO EXTRM BILAT | Venous Thromboembolism |
| ICD-10-CM | I82.C19 | AC EMBLSM&THRMBO UNSP INTER JUG VN | Venous Thromboembolism |
| ICD-10-CM | I82.4Y1 | AC THRMB UNSP DEEP VN R PRXML LO | Venous Thromboembolism |
| ICD-10-CM | I82.533 | CHR EMBLSM&THRMBO POPL VN BILAT | Venous Thromboembolism |
| ICD-10-CM | I82.701 | CHR EMBLSM&THRMBO UNSP VN R UP EXTRM | Venous Thromboembolism |
| ICD-10-CM | I82.593 | CHRNC THRMB OTH SP DEEP VN LO,BIL | Venous Thromboembolism |
| ICD-10-CM | I82.552 | CHR EMBLSM&THRMBO L PERON VN | Venous Thromboembolism |
| ICD-10-CM | I82.562 | CHR EMBLSM&THRMBO L CALF MUSCULAR VN | Venous Thromboembolism |
| ICD-10-CM | I82.C23 | CHR EMBLSM&THRMBO INTER JUG VN BILAT | Venous Thromboembolism |
| ICD-10-CM | I82.499 | AC THRMB OTH SPEC DEEP VN UNSP LO E | Venous Thromboembolism |
| ICD-10-CM | I82.543 | CHR EMBLSM&THRMBO TIB VN BILAT | Venous Thromboembolism |
| ICD-10-CM | I82.B29 | CHR EMBLSM&THRMBO UNSP SUBCLAV VN | Venous Thromboembolism |
| ICD-10-CM | I82.C12 | AC EMBLSM&THRMBO L INTER JUG VN | Venous Thromboembolism |
| ICD-10-CM | I80.10 | PHLBTS&THRPHLBTS UNSP FEMR VN | Venous Thromboembolism |
| ICD-10-CM | I82.492 | AC THRMB OTH SPEC DEEP VN L LO EX | Venous Thromboembolism |
| ICD-10-CM | I82.5Y9 | CHRNC THRMB UNSP DEEP VN UNSP PRXM L | Venous Thromboembolism |
| ICD-10-CM | I82.601 | AC EMBLSM&THRMBO UNSP VN R UP EXTRM | Venous Thromboembolism |
| ICD-10-CM | I26.09 | OTH PULM EMBLSM W AC COR PULMONALE | Venous Thromboembolism |
| ICD-10-CM | I26.92 | SADDL EMBLS PULM ART WO ACT COR PU | Venous Thromboembolism |
| ICD-10-CM | I82.211 | CHR EMBLSM&THRMBO SVC | Venous Thromboembolism |
| ICD-10-CM | I82.442 | AC EMBLSM&THRMBO L TIB VN | Venous Thromboembolism |
| ICD-10-CM | I82.529 | CHR EMBLSM&THRMBO UNSP ILAC VN | Venous Thromboembolism |
| ICD-10-CM | I82.531 | CHR EMBLSM&THRMBO R POPL VN | Venous Thromboembolism |
| ICD-10-CM | I82.723 | CHR EMBLSM&THRMBO DP VN UP EXTRM BILAT | Venous Thromboembolism |
| ICD-10-CM | I82.890 | AC EMBLSM&THRMBO OTH SPEC VN | Venous Thromboembolism |
| ICD-10-CM | I80.11 | PHLBTS&THRPHLBTS R FEMR VN | Venous Thromboembolism |
| ICD-10-CM | I80.233 | PHLBTS&THRPHLBTS TIB VN BILAT | Venous Thromboembolism |
| ICD-10-CM | I80.241 | PHLBTS&THRPHLBTS R PERON VN | Venous Thromboembolism |
| ICD-10-CM | I80.3 | PHLBTS&THRPHLBTS LO EXTRM UNSP | Venous Thromboembolism |
| ICD-10-CM | I82.453 | AC EMBLSM&THRMBO PERON VN BILAT | Venous Thromboembolism |
| ICD-10-CM | I82.A19 | AC EMBLSM&THRMBO UNSP AXLY VN | Venous Thromboembolism |
| ICD-10-CM | I82.3 | EMBLSM&THRMBO REN VN | Venous Thromboembolism |
| ICD-10-CM | I82.429 | AC EMBLSM&THRMBO UNSP ILAC VN | Venous Thromboembolism |
| ICD-10-CM | I82.4Z3 | AC THRMB UNSP DEEP VN DSTL LO,BILAT | Venous Thromboembolism |
| ICD-10-CM | I82.511 | CHR EMBLSM&THRMBO R FEMR VN | Venous Thromboembolism |
| ICD-10-CM | I82.811 | EMBLSM&THRMBO SUPRF VN R LO EXTRM | Venous Thromboembolism |
| ICD-10-CM | I82.C22 | CHR EMBLSM&THRMBO L INTER JUG VN | Venous Thromboembolism |
| ICD-10-CM | I80.293 | PHLEBITS,OTH DEEP VSL,LWR EXTRM,BIL | Venous Thromboembolism |
| ICD-10-CM | I82.4Y3 | AC THRMB UNSP DEEP VN PRXM LO BILAT | Venous Thromboembolism |
| ICD-10-CM | I82.591 | CHRNC THRMBO OTH SP DEEP VN R LO | Venous Thromboembolism |
| ICD-10-CM | I82.5Y1 | CHRNC THRMBO UNSP DEEP VN R PRXM L | Venous Thromboembolism |
| ICD-10-CM | I82.621 | AC EMBLSM&THRMBO DP VN R UP EXTRM | Venous Thromboembolism |
| ICD-10-CM | I82.622 | AC EMBLSM&THRMBO DP VN L UP EXTRM | Venous Thromboembolism |
| ICD-10-CM | I82.712 | CHR EMBLSM&THRMBO SUPRF VN L UP EXTRM | Venous Thromboembolism |
| ICD-10-CM | I82.B11 | AC EMBLSM&THRMBO R SUBCLAV VN | Venous Thromboembolism |
| ICD-10-CM | I80.259 | PHLBTS&THRPHLBTS UNSP CALF MUSCULAR VN | Venous Thromboembolism |
| ICD-10-CM | I80.9 | PHLBTS&THRPHLBTS UNSP SIT | Venous Thromboembolism |
| ICD-10-CM | I82.402 | AC EMBL&THRMBO UNSP DEEP VN L LO EXTRM | Venous Thromboembolism |
| ICD-10-CM | I82.432 | AC EMBLSM&THRMBO L POPL VN | Venous Thromboembolism |
| ICD-10-CM | I82.461 | AC EMBLSM&THRMBO R CALF MUSCULAR VN | Venous Thromboembolism |
| ICD-10-CM | I82.502 | CHRN THRMBO UNSP DEEP VNS L LO EXT | Venous Thromboembolism |
| ICD-10-CM | I80.202 | PHLEBITIS,UNSP DEEP VSL L LO EXTRM | Venous Thromboembolism |
| ICD-10-CM | I80.252 | PHLBTS&THRPHLBTS L CALF MUSCULAR VN | Venous Thromboembolism |
| ICD-10-CM | I82.603 | ACUTE THRMBOOSI,UNSP VNS,UPR EXT,BIL | Venous Thromboembolism |
| ICD-10-CM | I82.C11 | AC EMBLSM&THRMBO R INTER JUG VN | Venous Thromboembolism |
| ICD-10-CM | I80.299 | PHLEBITS,OTH DEEP VSL,UNSP LO EXTRM | Venous Thromboembolism |
| ICD-10-CM | I82.B13 | AC EMBLSM&THRMBO SUBCLAV VN BILAT | Venous Thromboembolism |
| ICD-10-CM | I82.403 | AC EMBL&THRMBO UNSP DP VN LO EXTR,BILAT | Venous Thromboembolism |
| ICD-10-CM | I82.431 | AC EMBLSM&THRMBO R POPL VN | Venous Thromboembolism |
| ICD-10-CM | I82.563 | CHRON EMBOL/THRM CALF MUSC VEIN BIL | Venous Thromboembolism |
| ICD-10-CM | I82.592 | CHRNC THRMBO OTH SP DEEP VN L LE | Venous Thromboembolism |
| ICD-10-CM | I82.C29 | CHR EMBLSM&THRMBO UNSP INTER JUG VN | Venous Thromboembolism |
| ICD-10-CM | I26.99 | OTH PULM EMBLSM WO AC COR PULMONALE | Venous Thromboembolism |
| ICD-10-CM | I80.232 | PHLBTS&THRPHLBTS L TIB VN | Venous Thromboembolism |
| ICD-10-CM | I80.251 | PHLBTS&THRPHLBTS R CALF MUSCULAR VN | Venous Thromboembolism |
| ICD-10-CM | I82.423 | AC EMBLSM&THRMBO ILAC VN BILAT | Venous Thromboembolism |
| ICD-10-CM | I82.5Y3 | CHRNC THRMB UNSP DEEP VN PRXM LO,BIL | Venous Thromboembolism |
| ICD-10-CM | I82.711 | CHR EMBLSM&THRMBO SUPRF VN R UP EXTRM | Venous Thromboembolism |

| Bleeding | | |
| --- | --- | --- |
| **Code Type** | **Code** | **Description** |
| ICD-10-CM | D78.01 | Intraoperative hemorrhage and hematoma of the spleen complicating a procedure on the spleen |
| ICD-10-CM | D78.02 | Intraoperative hemorrhage and hematoma of the spleen complicating other procedure |
| ICD-10-CM | D78.21 | Postprocedural hemorrhage of the spleen following a procedure on the spleen |
| ICD-10-CM | D78.22 | Postprocedural hemorrhage of the spleen following other procedure |
| ICD-10-CM | D78.31 | Postprocedural hematoma of the spleen following a procedure on the spleen |
| ICD-10-CM | D78.32 | Postprocedural hematoma of the spleen following other procedure |
| ICD-10-CM | E36.01 | Intraoperative hemorrhage and hematoma of an endocrine system organ or structure complicating an endocrine system procedure |
| ICD-10-CM | E36.02 | Intraoperative hemorrhage and hematoma of an endocrine system organ or structure complicating other procedure |
| ICD-10-CM | E89.810 | Postprocedural hemorrhage of an endocrine system organ or structure following an endocrine system procedure |
| ICD-10-CM | E89.811 | Postprocedural hemorrhage of an endocrine system organ or structure following other procedure |
| ICD-10-CM | E89.820 | Postprocedural hematoma of an endocrine system organ or structure following an endocrine system procedure |
| ICD-10-CM | E89.821 | Postprocedural hematoma of an endocrine system organ or structure following other procedure |
| ICD-10-CM | G97.31 | Intraoperative hemorrhage and hematoma of a nervous system organ or structure complicating a nervous system procedure |
| ICD-10-CM | G97.32 | Intraoperative hemorrhage and hematoma of a nervous system organ or structure complicating other procedure |
| ICD-10-CM | G97.51 | Postprocedural hemorrhage of a nervous system organ or structure following a nervous system procedure |
| ICD-10-CM | G97.52 | Postprocedural hemorrhage of a nervous system organ or structure following other procedure |
| ICD-10-CM | G97.61 | Postprocedural hematoma of a nervous system organ or structure following a nervous system procedure |
| ICD-10-CM | G97.62 | Postprocedural hematoma of a nervous system organ or structure following other procedure |
| ICD-10-CM | I97.410 | Intraoperative hemorrhage and hematoma of a circulatory system organ or structure complicating a cardiac catheterization |
| ICD-10-CM | I97.411 | Intraoperative hemorrhage and hematoma of a circulatory system organ or structure complicating a cardiac bypass |
| ICD-10-CM | I97.418 | Intraoperative hemorrhage and hematoma of a circulatory system organ or structure complicating other circulatory system procedure |
| ICD-10-CM | I97.42 | Intraoperative hemorrhage and hematoma of a circulatory system organ or structure complicating other procedure |
| ICD-10-CM | I97.610 | Postprocedural hemorrhage of a circulatory system organ or structure following a cardiac catheterization |
| ICD-10-CM | I97.611 | Postprocedural hemorrhage of a circulatory system organ or structure following cardiac bypass |
| ICD-10-CM | I97.618 | Postprocedural hemorrhage of a circulatory system organ or structure following other circulatory system procedure |
| ICD-10-CM | I97.620 | Postprocedural hemorrhage of a circulatory system organ or structure following other procedure |
| ICD-10-CM | I97.621 | Postprocedural hematoma of a circulatory system organ or structure following other procedure |
| ICD-10-CM | I97.630 | Postprocedural hematoma of a circulatory system organ or structure following a cardiac catheterization |
| ICD-10-CM | I97.631 | Postprocedural hematoma of a circulatory system organ or structure following cardiac bypass |
| ICD-10-CM | I97.638 | Postprocedural hematoma of a circulatory system organ or structure following other circulatory system procedure |
| ICD-10-CM | J95.61 | Intraoperative hemorrhage and hematoma of a respiratory system organ or structure complicating a respiratory system procedure |
| ICD-10-CM | J95.62 | Intraoperative hemorrhage and hematoma of a respiratory system organ or structure complicating other procedure |
| ICD-10-CM | J95.830 | Postprocedural hemorrhage of a respiratory system organ or structure following a respiratory system procedure |
| ICD-10-CM | J95.831 | Postprocedural hemorrhage of a respiratory system organ or structure following other procedure |
| ICD-10-CM | J95.860 | Postprocedural hematoma of a respiratory system organ or structure following a respiratory system procedure |
| ICD-10-CM | J95.861 | Postprocedural hematoma of a respiratory system organ or structure following other procedure |
| ICD-10-CM | K91.61 | Intraoperative hemorrhage and hematoma of a digestive system organ or structure complicating a digestive system procedure |
| ICD-10-CM | K91.62 | Intraoperative hemorrhage and hematoma of a digestive system organ or structure complicating other procedure |
| ICD-10-CM | K91.840 | Postprocedural hemorrhage of a digestive system organ or structure following a digestive system procedure |
| ICD-10-CM | K91.841 | Postprocedural hemorrhage of a digestive system organ or structure following other procedure |
| ICD-10-CM | K91.870 | Postprocedural hematoma of a digestive system organ or structure following a digestive system procedure |
| ICD-10-CM | K91.871 | Postprocedural hematoma of a digestive system organ or structure following other procedure |
| ICD-10-CM | L76.01 | Intraoperative hemorrhage and hematoma of skin and subcutaneous tissue complicating a dermatologic procedure |
| ICD-10-CM | L76.02 | Intraoperative hemorrhage and hematoma of skin and subcutaneous tissue complicating other procedure |
| ICD-10-CM | L76.21 | Postprocedural hemorrhage of skin and subcutaneous tissue following a dermatologic procedure |
| ICD-10-CM | L76.22 | Postprocedural hemorrhage of skin and subcutaneous tissue following other procedure |
| ICD-10-CM | L76.31 | Postprocedural hematoma of skin and subcutaneous tissue following a dermatologic procedure |
| ICD-10-CM | L76.32 | Postprocedural hematoma of skin and subcutaneous tissue following other procedure |
| ICD-10-CM | M96.810 | Intraoperative hemorrhage and hematoma of a musculoskeletal structure complicating a musculoskeletal system procedure |
| ICD-10-CM | M96.811 | Intraoperative hemorrhage and hematoma of a musculoskeletal structure complicating other procedure |
| ICD-10-CM | M96.830 | Postprocedural hemorrhage of a musculoskeletal structure following a musculoskeletal system procedure |
| ICD-10-CM | M96.831 | Postprocedural hemorrhage of a musculoskeletal structure following other procedure |
| ICD-10-CM | M96.840 | Postprocedural hematoma of a musculoskeletal structure following a musculoskeletal system procedure |
| ICD-10-CM | M96.841 | Postprocedural hematoma of a musculoskeletal structure following other procedure |
| ICD-10-CM | N99.61 | Intraoperative hemorrhage and hematoma of a genitourinary system organ or structure complicating a genitourinary system procedure |
| ICD-10-CM | N99.62 | Intraoperative hemorrhage and hematoma of a genitourinary system organ or structure complicating other procedure |
| ICD-10-CM | N99.820 | Postprocedural hemorrhage of a genitourinary system organ or structure following a genitourinary system procedure |
| ICD-10-CM | N99.821 | Postprocedural hemorrhage of a genitourinary system organ or structure following other procedure |
| ICD-10-CM | N99.840 | Postprocedural hematoma of a genitourinary system organ or structure following a genitourinary system procedure |
| ICD-10-CM | N99.841 | Postprocedural hematoma of a genitourinary system organ or structure following other procedure |

| Bleeding Location | | |
| --- | --- | --- |
| **Code Type** | **Code** | **Description** |
| ICD-10-PCS | 0W30 | Control of Bleeding in the Head |
| ICD-10-PCS | 0W31 | Control of Bleeding in the Cranial Cavity |
| ICD-10-PCS | 0W32 | Control of Bleeding in the Face |
| ICD-10-PCS | 0W33 | Control of Bleeding in the Oral Cavity and Throat |
| ICD-10-PCS | 0W34 | Control of Bleeding in the Upper Jaw |
| ICD-10-PCS | 0W35 | Control of Bleeding in the Lower Jaw |
| ICD-10-PCS | 0W36 | Control of Bleeding in the Neck |
| ICD-10-PCS | 0W38 | Control of Bleeding in the Chest Wall |
| ICD-10-PCS | 0W39 | Control of Bleeding in the Pleural Cavity, Right |
| ICD-10-PCS | 0W3B | Control of Bleeding in the Pleural Cavity, Left |
| ICD-10-PCS | 0W3C | Control of Bleeding in the Mediastinum |
| ICD-10-PCS | 0W3D | Control of Bleeding in the Pericardial Cavity |
| ICD-10-PCS | 0W3F | Control of Bleeding in the Abdominal Wall |
| ICD-10-PCS | 0W3G | Control of Bleeding in the Peritoneal Cavity |
| ICD-10-PCS | 0W3H | Control of Bleeding in the Retroperitoneum |
| ICD-10-PCS | 0W3J | Control of Bleeding in the  Pelvic Cavity |
| ICD-10-PCS | 0W3K | Control of Bleeding in the Upper Back |
| ICD-10-PCS | 0W3L | Control of Bleeding in the Lower Back |
| ICD-10-PCS | 0W3M | Control of Bleeding in the Perineum, Male |
| ICD-10-PCS | 0W3N | Control of Bleeding in the Perineum, Female |
| ICD-10-PCS | 0W3P | Control of Bleeding in the Gastrointestinal Tract |
| ICD-10-PCS | 0W3Q | Control of Bleeding in the Respiratory Tract |
| ICD-10-PCS | 0W3R | Control of Bleeding in the Genitourinary Tract |

| Transfusion | | | |
| --- | --- | --- | --- |
| **Group Level** | **Code Type** | **ICD Code** | **ICD Code Description** |
| Exchange transfusion Other transfusion of whole blood | ICD-10-PCS | 30233H1 | Transfusion of Nonautologous Whole Blood into Peripheral Vein, Percutaneous Approach |
| Exchange transfusion Other transfusion of whole blood | ICD-10-PCS | 30243H1 | Transfusion of Nonautologous Whole Blood into Central Vein, Percutaneous Approach |
| Exchange transfusion Other transfusion of whole blood | ICD-10-PCS | 30253H1 | Transfusion of Nonautologous Whole Blood into Peripheral Artery, Percutaneous Approach |
| Exchange transfusion Other transfusion of whole blood | ICD-10-PCS | 30263H1 | Transfusion of Nonautologous Whole Blood into Central Artery, Percutaneous Approach |
| Perioperative autologous transfusion of whole blood or blood components | ICD-10-PCS | 30233H0 | Transfusion of Autologous Whole Blood into Peripheral Vein, Percutaneous Approach |
| Perioperative autologous transfusion of whole blood or blood components | ICD-10-PCS | 30233N0 | Transfusion of Autologous Red Blood Cells into Peripheral Vein, Percutaneous Approach |
| Perioperative autologous transfusion of whole blood or blood components | ICD-10-PCS | 30243H0 | Transfusion of Autologous Whole Blood into Central Vein, Percutaneous Approach |
| Perioperative autologous transfusion of whole blood or blood components | ICD-10-PCS | 30243N0 | Transfusion of Autologous Red Blood Cells into Central Vein, Percutaneous Approach |
| Perioperative autologous transfusion of whole blood or blood components | ICD-10-PCS | 30253H0 | Transfusion of Autologous Whole Blood into Peripheral Artery, Percutaneous Approach |
| Perioperative autologous transfusion of whole blood or blood components | ICD-10-PCS | 30253N0 | Transfusion of Autologous Red Blood Cells into Peripheral Artery, Percutaneous Approach |
| Perioperative autologous transfusion of whole blood or blood components | ICD-10-PCS | 30263H0 | Transfusion of Autologous Whole Blood into Central Artery, Percutaneous Approach |
| Perioperative autologous transfusion of whole blood or blood components | ICD-10-PCS | 30263N0 | Transfusion of Autologous Red Blood Cells into Central Artery, Percutaneous Approach |
| Transfusion of coagulation factors | ICD-10-PCS | 30233T1 | Transfusion of Nonautologous Fibrinogen into Peripheral Vein, Percutaneous Approach |
| Transfusion of coagulation factors | ICD-10-PCS | 30233V1 | Transfusion of Nonautologous Antihemophilic Factors into Peripheral Vein, Percutaneous Approach |
| Transfusion of coagulation factors | ICD-10-PCS | 30233W1 | Transfusion of Nonautologous Factor IX into Peripheral Vein, Percutaneous Approach |
| Transfusion of coagulation factors | ICD-10-PCS | 30243T1 | Transfusion of Nonautologous Fibrinogen into Central Vein, Percutaneous Approach |
| Transfusion of coagulation factors | ICD-10-PCS | 30243V1 | Transfusion of Nonautologous Antihemophilic Factors into Central Vein, Percutaneous Approach |
| Transfusion of coagulation factors | ICD-10-PCS | 30243W1 | Transfusion of Nonautologous Factor IX into Central Vein, Percutaneous Approach |
| Transfusion of coagulation factors | ICD-10-PCS | 30253T1 | Transfusion of Nonautologous Fibrinogen into Peripheral Artery, Percutaneous Approach |
| Transfusion of coagulation factors | ICD-10-PCS | 30253V1 | Transfusion of Nonautologous Antihemophilic Factors into Peripheral Artery, Percutaneous Approach |
| Transfusion of coagulation factors | ICD-10-PCS | 30253W1 | Transfusion of Nonautologous Factor IX into Peripheral Artery, Percutaneous Approach |
| Transfusion of coagulation factors | ICD-10-PCS | 30263T1 | Transfusion of Nonautologous Fibrinogen into Central Artery, Percutaneous Approach |
| Transfusion of coagulation factors | ICD-10-PCS | 30263V1 | Transfusion of Nonautologous Antihemophilic Factors into Central Artery, Percutaneous Approach |
| Transfusion of coagulation factors | ICD-10-PCS | 30263W1 | Transfusion of Nonautologous Factor IX into Central Artery, Percutaneous Approach |
| Transfusion of cryoprecipitate | ICD-10-PCS | 30233M1 | Transfusion of Nonautologous Plasma Cryoprecipitate into Peripheral Vein, Percutaneous Approach |
| Transfusion of cryoprecipitate | ICD-10-PCS | 30243M1 | Transfusion of Nonautologous Plasma Cryoprecipitate into Central Vein, Percutaneous Approach |
| Transfusion of cryoprecipitate | ICD-10-PCS | 30253M1 | Transfusion of Nonautologous Plasma Cryoprecipitate into Peripheral Artery, Percutaneous Approach |
| Transfusion of cryoprecipitate | ICD-10-PCS | 30263M1 | Transfusion of Nonautologous Plasma Cryoprecipitate into Central Artery, Percutaneous Approach |
| Transfusion of fresh/frozen plasma | ICD-10-PCS | 30233K1 | Transfusion of Nonautologous Frozen Plasma into Peripheral Vein, Percutaneous Approach |
| Transfusion of fresh/frozen plasma | ICD-10-PCS | 30233L1 | Transfusion of Nonautologous Fresh Plasma into Peripheral Vein, Percutaneous Approach |
| Transfusion of fresh/frozen plasma | ICD-10-PCS | 30243K1 | Transfusion of Nonautologous Frozen Plasma into Central Vein, Percutaneous Approach |
| Transfusion of fresh/frozen plasma | ICD-10-PCS | 30243L1 | Transfusion of Nonautologous Fresh Plasma into Central Vein, Percutaneous Approach |
| Transfusion of fresh/frozen plasma | ICD-10-PCS | 30253K1 | Transfusion of Nonautologous Frozen Plasma into Peripheral Artery, Percutaneous Approach |
| Transfusion of fresh/frozen plasma | ICD-10-PCS | 30253L1 | Transfusion of Nonautologous Fresh Plasma into Peripheral Artery, Percutaneous Approach |
| Transfusion of fresh/frozen plasma | ICD-10-PCS | 30263K1 | Transfusion of Nonautologous Frozen Plasma into Central Artery, Percutaneous Approach |
| Transfusion of fresh/frozen plasma | ICD-10-PCS | 30263L1 | Transfusion of Nonautologous Fresh Plasma into Central Artery, Percutaneous Approach |
| Transfusion of other serum or serum protein | ICD-10-PCS | 30233J1 | Transfusion of Nonautologous Serum Albumin into Peripheral Vein, Percutaneous Approach |
| Transfusion of other serum or serum protein | ICD-10-PCS | 30243J1 | Transfusion of Nonautologous Serum Albumin into Central Vein, Percutaneous Approach |
| Transfusion of other serum or serum protein | ICD-10-PCS | 30253J1 | Transfusion of Nonautologous Serum Albumin into Peripheral Artery, Percutaneous Approach |
| Transfusion of other serum or serum protein | ICD-10-PCS | 30263J1 | Transfusion of Nonautologous Serum Albumin into Central Artery, Percutaneous Approach |
| Transfusion of other substance | ICD-10-PCS | 30233Q1 | Transfusion of Nonautologous White Cells into Peripheral Vein, Percutaneous Approach |
| Transfusion of other substance | ICD-10-PCS | 30243Q1 | Transfusion of Nonautologous White Cells into Central Vein, Percutaneous Approach |
| Transfusion of other substance | ICD-10-PCS | 30253Q1 | Transfusion of Nonautologous White Cells into Peripheral Artery, Percutaneous Approach |
| Transfusion of other substance | ICD-10-PCS | 30263Q1 | Transfusion of Nonautologous White Cells into Central Artery, Percutaneous Approach |
| Transfusion of packed cells | ICD-10-PCS | 30233N1 | Transfusion of Nonautologous Red Blood Cells into Peripheral Vein, Percutaneous Approach |
| Transfusion of packed cells | ICD-10-PCS | 30233P1 | Transfusion of Nonautologous Frozen Red Cells into Peripheral Vein, Percutaneous Approach |
| Transfusion of packed cells | ICD-10-PCS | 30243N1 | Transfusion of Nonautologous Red Blood Cells into Central Vein, Percutaneous Approach |
| Transfusion of packed cells | ICD-10-PCS | 30243P1 | Transfusion of Nonautologous Frozen Red Cells into Central Vein, Percutaneous Approach |
| Transfusion of packed cells | ICD-10-PCS | 30253N1 | Transfusion of Nonautologous Red Blood Cells into Peripheral Artery, Percutaneous Approach |
| Transfusion of packed cells | ICD-10-PCS | 30253P1 | Transfusion of Nonautologous Frozen Red Cells into Peripheral Artery, Percutaneous Approach |
| Transfusion of packed cells | ICD-10-PCS | 30263N1 | Transfusion of Nonautologous Red Blood Cells into Central Artery, Percutaneous Approach |
| Transfusion of packed cells | ICD-10-PCS | 30263P1 | Transfusion of Nonautologous Frozen Red Cells into Central Artery, Percutaneous Approach |
| Transfusion of platelets | ICD-10-PCS | 30233R1 | Transfusion of Nonautologous Platelets into Peripheral Vein, Percutaneous Approach |
| Transfusion of platelets | ICD-10-PCS | 30243R1 | Transfusion of Nonautologous Platelets into Central Vein, Percutaneous Approach |
| Transfusion of platelets | ICD-10-PCS | 30253R1 | Transfusion of Nonautologous Platelets into Peripheral Artery, Percutaneous Approach |
| Transfusion of platelets | ICD-10-PCS | 30263R1 | Transfusion of Nonautologous Platelets into Central Artery, Percutaneous Approach |
| Transfusion of previously collected autologous blood | ICD-10-PCS | 30233W0 | Transfusion of Autologous Factor IX into Peripheral Vein, Percutaneous Approach |
| Transfusion of previously collected autologous blood | ICD-10-PCS | 30243W0 | Transfusion of Autologous Factor IX into Central Vein, Percutaneous Approach |
| Transfusion of previously collected autologous blood | ICD-10-PCS | 30253W0 | Transfusion of Autologous Factor IX into Peripheral Artery, Percutaneous Approach |
| Transfusion of previously collected autologous blood | ICD-10-PCS | 30263W0 | Transfusion of Autologous Factor IX into Central Artery, Percutaneous Approach |

# Sensitivity Analysis

The overall proportion of patients with disruptive surgical bleeding was 7.1%; the proportion of patients with disruptive surgical bleeding was 3.1% with bariatric surgery, 5.1% with TKA, 9.3% with spine surgery, 6.0% with THA, and 11.7% with colorectal surgery (**Figure S1**).

The adjusted association of disruptive bleeding with mean operating room time, 90-day all-cause inpatient readmission rates, and inpatient mortality rates, stratified by index surgical procedure, is presented in **Table S2**. Disruptive bleeding was associated with significantly longer operating room times for patients undergoing all five procedures (incremental increases ranged from 7.2 minutes for TKA to 43.1 minutes for bariatric surgery; p≤0.05). Disruptive bleeding was also associated with statistically significant increased risks of 90-day all-cause readmission for patients undergoing bariatric surgery, colorectal surgery, spine surgery, and THA (incremental absolute risk increases ranged from 0.4% for TKA to 4.3% for colorectal surgery; p<0.05). Finally, disruptive bleeding conferred a significant increase in the risk of inpatient mortality during the index admission for patients undergoing all five procedures of interest (incremental absolute risk increases ranged from 0.1% for THA and TKA to 2.0% for colorectal surgery; p≤0.05).

Table S2. Association of Disruptive Bleeding with Time in Operating Room, Readmission within 90 Days for Any Cause, and Inpatient Mortality in All Patients (Adjusted Results)

| Procedures | Operating Room Time | 90-Day All-Cause Inpatient Readmission | Inpatient Mortality During Index Admission |
| --- | --- | --- | --- |
|  | **Mean Minutes (95% CI)** | **Percentages (95% CI)** | **Percentages (95% CI)** |
| Bariatric Surgery (N=50,316) | | | | |
| No disruptive bleeding | 139.1 (134.1 – 144.0) | 4.4% (4.2% – 4.6%) | 0.1% (0.1% – 0.1%) |
| Disruptive bleeding | 182.1 (165.2 – 199.1) | 7.6% (6.1% – 9.1%) | 0.4% (0.2% – 0.6%) |
| Incremental differences | 43.1 (26.6 – 59.5) | 3.2% (1.7% – 4.7%) | 0.3% (0.1% – 0.6%) |
| p-value* | **<0.001** | **<0.001** | **0.004** |
| Colorectal Surgery (N=61,716) | | | | |
| No disruptive bleeding | 226.9 (221.2 – 232.6) | 16.2% (15.8% – 16.7%) | 1.8% (1.7% – 1.9%) |
| Disruptive bleeding | 268.3 (260.1 – 276.5) | 20.5% (19.5% – 21.5%) | 3.8% (3.4% – 4.1%) |
| Incremental differences | 41.4 (35.7 – 47.2) | 4.3% (3.2% – 5.4%) | 2.0% (1.6% – 2.4%) |
| p-value* | **<0.001** | **<0.001** | **<0.001** |
| Spine Surgery (N=101,270) | | | | |
| No disruptive bleeding | 209.9 (204.6 – 215.2) | 5.7% (5.5% – 5.9%) | 0.1% (0.1% –0.1%) |
| Disruptive bleeding | 251.8 (239.1 – 264.4) | 6.3% (5.8% – 6.8%) | 0.3% (0.2% – 0.4%) |
| Incremental differences | 41.9 (30.3 – 53.5) | 0.6% (0.1% – 1.1%) | 0.2% (0.1% – 0.2%) |
| p-value* | **<0.001** | **0.016** | **<0.001** |
| THA (N=109,482) | | | | |
| No disruptive bleeding | 144.4 (141.2 – 147.6) | 6.6% (6.4% – 6.8%) | 0.1% (0.0% – 0.1%) |
| Disruptive bleeding | 169.8 (162.6 – 176.9) | 9.5% (8.3% – 10.7%) | 0.2% (0.1% – 0.2%) |
| Incremental differences | 25.4 (18.6 – 32.2) | 2.9% (1.7% – 4.1%) | 0.1% (0.0% – 0.2%) |
| p-value* | **<0.001** | **<0.001** | **0.017** |
| TKA (N=175,384) | | | | |
| No disruptive bleeding | 139.6 (136.5 – 142.6) | 4.7% (4.5% – 4.9%) | 0.0% (0.0% – 0.0%) |
| Disruptive bleeding | 146.8 (140.1 – 153.5) | 5.1% (4.4% – 5.8%) | 0.1% (0.0% – 0.2%) |
| Incremental differences | 7.2 (0.5 – 14.0) | 0.4% (-0.3% – 1.1%) | 0.1% (0.0% – 0.1%) |
| p-value* | **0.036** | 0.243 | **0.017** |

* Bolded values denote statistical significance at p<0.05.

CI, confidence interval; THA, total hip arthroplasty; TKA, total knee arthroplasty.

**Table S3** presents the adjusted association of disruptive bleeding with admission to ICU, duration of ICU stay, and ventilator use, stratified by index surgical procedure. Disruptive bleeding was associated with statistically significant increased risks of admission to ICU for all five procedures of interest (incremental absolute risk increases ranging from 0.7% for TKA to 16.8% for colorectal surgery; p≤0.001) and longer durations of ICU stay for all of the procedures except THA (incremental increases ranging from 0.9 days for spine surgery to 2.2 days for bariatric surgery; p≤0.001). Disruptive bleeding was also associated with statistically significant higher risks of ventilator use across all five procedures (incremental absolute risk increases ranging from 0.4% for THA and TKA to 10.0% for colorectal surgery; p≤0.005).

Table S3. Association of Disruptive Bleeding with ICU Admission and Duration and Ventilator Use in All Patients (Adjusted Results)

| Procedures | Admission to ICU | ICU Stay | Ventilator Use |
| --- | --- | --- | --- |
|  | **Percentages (95% CI)** | **Mean Days (95% CI)** | **Percentages (95% CI)** |
| Bariatric Surgery (N=50,316) | | | |
| No disruptive bleeding | 1.7% (1.3% – 2.1%) | 2.6 (2.4 – 2.9) | 0.6% (0.5% – 0.7%) |
| Disruptive bleeding | 9.2% (6.6% – 11.8%) | 4.8 (4.1 – 5.5) | 4.0% (2.6% – 5.3%) |
| Incremental differences | 7.6% (5.0% – 10.1%) | 2.2 (1.5 – 2.9) | 3.4% (2.0% – 4.7%) |
| p-value* | **<0.001** | **<0.001** | **0.004** |
| Colorectal Surgery (N=61,716) | | | |
| No disruptive bleeding | 14.6% (13.6% – 15.5%) | 4.1 (4.0 – 4.2) | 6.8% (6.5% – 7.2%) |
| Disruptive bleeding | 31.4% (29.4% – 33.3%) | 6.1 (5.9 – 6.4) | 16.8% (15.9% – 17.8%) |
| Incremental differences | 16.8% (15.1% – 18.5%) | 2.0 (1.7 – 2.3) | 10.0% (9.0% – 10.9%) |
| p-value* | **<0.001** | **<0.001** | **<0.001** |
| Spine Surgery (N=165,461) | | | |
| No disruptive bleeding | 8.6% (7.5% – 9.6%) | 2.9 (2.8 – 3.1) | 2.1% (1.9% – 2.3%) |
| Disruptive bleeding | 15.9% (13.3% – 18.4%) | 3.8 (3.5 – 4.0) | 5.8% (5.1% – 6.6%) |
| Incremental differences | 7.3% (5.0% – 9.6%) | 0.9 (0.6 – 1.1) | 3.8% (3.0% – 4.5%) |
| p-value* | **<0.001** | **<0.001** | **<0.001** |
| THA (N=109,482) | | | |
| No disruptive bleeding | 0.8% (0.7% – 1.0%) | 2.6 (2.5 – 2.8) | 0.2% (0.2% –0.3%) |
| Disruptive bleeding | 3.3% (2.7% – 3.8%) | 3.0 (2.7 – 3.3) | 0.6% (0.5% – 0.8%) |
| Incremental differences | 2.4% (1.9% – 3.0%) | 0.3 (0.0 – 0.7) | 0.4% (0.3% – 0.6%) |
| p-value* | **<0.001** | 0.053 | **<0.001** |
| TKA (N=175,384) | | | |
| No disruptive bleeding | 0.7% (0.4% – 1.0%) | 2.4 (2.2 – 2.6) | 0.2% (0.1% – 0.2%) |
| Disruptive bleeding | 1.5% (1.1% – 1.8%) | 3.7 (3.0 – 4.3) | 0.5% (0.4% – 0.7%) |
| Incremental differences | 0.7% (0.3% – 1.1%) | 1.3 (0.6 – 2.0) | 0.4% (0.2% – 0.6%) |
| p-value* | **<0.001** | **<0.001** | **0.004** |

* Bolded values denote statistical significance at p<0.05.

CI, confidence interval; ICU, intensive care unit; THA, total hip arthroplasty; TKA, total knee arthroplasty.

The adjusted association of disruptive bleeding with total hospital cost and length of stay for index admission, stratified by index surgical procedure, are presented in **Table S4**. Disruptive bleeding was uniformly associated with statistically significant increases in total hospital costs for all five procedures (incremental increases ranging from $2,539 for TKA to $16,824 for colorectal surgery; p≤0.005), as well as increases in length of stay for all five procedures (incremental increases ranging from 0.6 days for TKA to 4.0 days for colorectal surgery; p≤0.001).

Table S4. Association of Disruptive Bleeding with Total Hospital Cost and Index Admission Length of Stay in All Patients (Adjusted Results)

| Procedures | Total Hospital Cost | LOS |
| --- | --- | --- |
|  | **Mean (95% CI)** | **Mean Days (95% CI)** |
| Bariatric Surgery (N=50,316) | |  |
| No disruptive bleeding | $15,009 ($14,443 – $15,575) | 1.8 (1.7 – 1.9) |
| Disruptive bleeding | $23,747 ($20,109 – $27,385) | 3.5 (2.9 – 4.1) |
| Incremental differences | $8,738 ($5,105 – $12,371) | 1.7 (1.1 – 2.3) |
| p-value* | **<0.001** | **<0.001** |
| Colorectal Surgery (N=61,716) | | |
| No disruptive bleeding | $26,011 ($25,387 – $26,634) | 6.5 (6.4 – 6.7) |
| Disruptive bleeding | $42,835 ($40,992 – $44,678) | 10.6 (10.3 – 10.8) |
| Incremental differences | $16,824 ($15,181 – $18,468) | 4.0 (3.8 – 4.3) |
| p-value* | **<0.001** | **<0.001** |
| Spine Surgery (N=165,461) | | |
| No disruptive bleeding | $25,966 ($25,052 – $26,880) | 3.6 (3.5 – 3.6) |
| Disruptive bleeding | $35,070 ($32,174 – $37,966) | 5.0 (4.8 – 5.3) |
| Incremental differences | $9,104 ($6,515 – $11,693) | 1.5 (1.2 – 1.7) |
| p-value* | **<0.001** | **<0.001** |
| THA (N=109,482) | | |
| No disruptive bleeding | $19,007 ($18,610 – $19,403) | 1.9 (1.9 – 2.0) |
| Disruptive bleeding | $24,179 ($22,178 – $26,180) | 3.0 (2.7 – 3.3) |
| Incremental differences | $5,172 ($3,225 – $7,120) | 1.0 (0.8 – 1.3) |
| p-value* | **<0.001** | **<0.001** |
| TKA (N=175,384) | | |
| No disruptive bleeding | $18,147 ($17,750 – $18,544) | 2.1 (2.0 – 2.1) |
| Disruptive bleeding | $20,686 ($19,078 – $22,294) | 2.7 (2.5 – 2.9) |
| Incremental differences | $2,539 ($988 – $4,089) | 0.6 (0.4 – 0.8) |
| p-value* | **0.001** | **<0.001** |

* Bolded values denote statistical significance at p<0.05.

CI, confidence interval; LOS, length of stay; THA, total hip arthroplasty; TKA, total knee arthroplasty.


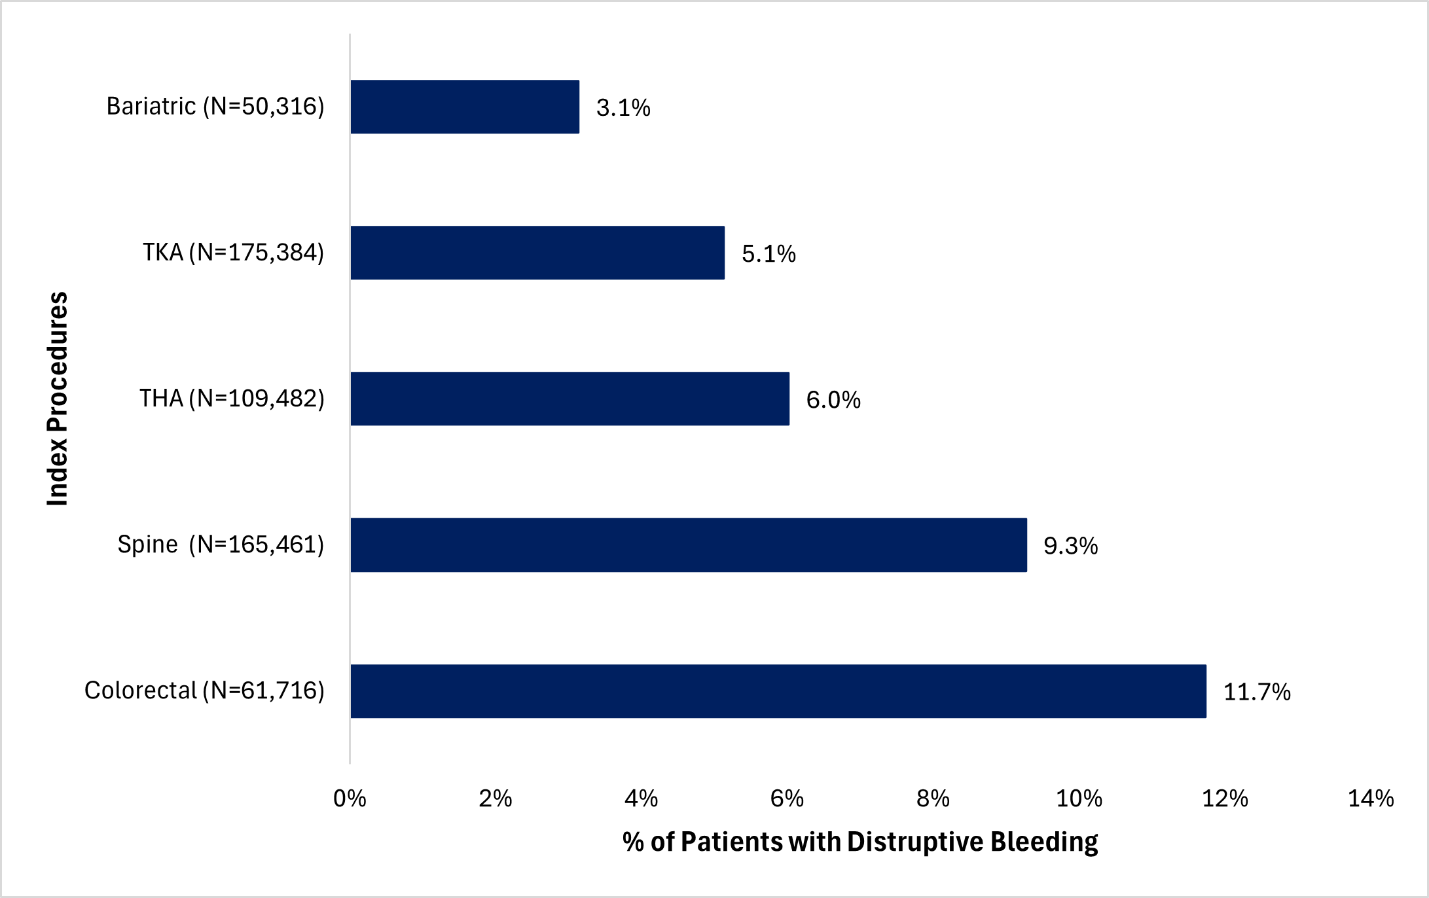


Figure S1. Proportion of Disruptive Bleeding Among All Patients

THA, total hip arthroplasty; TKA, total knee arthroplasty.
